# Supplementary material for: Prevalence and determinants of cigarette smoking relapse among US adult smokers: a longitudinal study
Source: PubMed Central journal article supplement — BMJ Open. 2019 Nov 25;9(11):e031676. doi: 10.1136/bmjopen-2019-031676 (PMC6886963; doi:10.1136/bmjopen-2019-031676), 2019-11-25
Supplement: bmjopen-2019-031676.draft_revisions.pdf [file bmjopen-2019-031676.draft_revisions.pdf]

# BMJ Open

BMJ Open is committed to open peer review. As part of this commitment we make the peer review history of every article we publish publicly available.

When an article is published we post the peer reviewers' comments and the authors' responses online. We also post the versions of the paper that were used during peer review. These are the versions that the peer review comments apply to.

The versions of the paper that follow are the versions that were submitted during the peer review process. They are not the versions of record or the final published versions. They should not be cited or distributed as the published version of this manuscript.

BMJ Open is an open access journal and the full, final, typeset and author-corrected version of record of the manuscript is available on our site with no access controls, subscription charges or pay-per-view fees (<http://bmjopen.bmj.com>).

If you have any questions on BMJ Open's open peer review process please email [info.bmjopen@bmj.com](mailto:info.bmjopen@bmj.com)

# BMJ Open

## Prevalence and determinants of cigarette smoking relapse among US adult smokers - a longitudinal study

|                               |                                                                                                                                                                                                                                                                                                                                |
|-------------------------------|--------------------------------------------------------------------------------------------------------------------------------------------------------------------------------------------------------------------------------------------------------------------------------------------------------------------------------|
| Journal:                      | <i>BMJ Open</i>                                                                                                                                                                                                                                                                                                                |
| Manuscript ID                 | bmjopen-2019-031676                                                                                                                                                                                                                                                                                                            |
| Article Type:                 | Research                                                                                                                                                                                                                                                                                                                       |
| Date Submitted by the Author: | 17-May-2019                                                                                                                                                                                                                                                                                                                    |
| Complete List of Authors:     | Alboksmaty, Ahmed; Imperial College London, School of Public Health<br>Agaku, Israel Terungwa; Harvard Univ<br>Odani, Satomi; National Center for Chronic Disease Prevention and Health Promotion, CDC<br>Filippidis, Filippos; Imperial College London, Department of Primary Care and Public Health, School of Public Health |
| Keywords:                     | PUBLIC HEALTH, Smoking, Prevention and control                                                                                                                                                                                                                                                                                 |
|                               |                                                                                                                                                                                                                                                                                                                                |

SCHOLARONE™  
Manuscripts

## Prevalence and determinants of cigarette smoking relapse among US adult smokers - a longitudinal study

Ahmed M. Alboksmaty, MPH<sup>1</sup>, Israel T. Agaku, PhD<sup>2</sup>, Satomi Odani, MPH<sup>2</sup>, Filippos T. Filippidis, PhD<sup>1</sup>

<sup>1</sup>: Department of Primary Care and Public Health, School of Public Health, Imperial College London, United Kingdom

<sup>2</sup>: Office of Smoking and Health, National Centre for Chronic Disease Prevention and Health Promotion, Centres for Disease Control and Prevention, Atlanta, Georgia

### Corresponding author:

|                |                                                                                                                        |
|----------------|------------------------------------------------------------------------------------------------------------------------|
| <b>Name</b>    | <b>Ahmed Alboksmaty</b>                                                                                                |
| <b>Address</b> | School of Public Health, Imperial College London, Reynolds Building, St. Dunstan's Road, London W6 8RP, United Kingdom |
| <b>Tel</b>     | +20 115 421 5691                                                                                                       |
| <b>Email</b>   | ama1716@ic.ac.uk                                                                                                       |

## ABSTRACT

**Objectives:** This research project aims at estimating the prevalence of cigarette smoking relapse and determine its predictors among adult former smokers in the United States (US).

**Setting:** This research analysed secondary data retrieved from the Tobacco Use Supplement-Current Population Survey (TUS-CPS) 2010-11 cohort in the US.

**Participants:** Out of 18,499 participants responded to the survey in 2010 and 2011, the analysis included a total sample size of 3,258 ever smokers, who were living in the US and reported quitting smoking in 2010. The survey's respondents who never smoked or reported current smoking status in 2010 were excluded from the study sample.

**Primary and secondary outcome measures:** Smoking relapse was defined as picking up smoking in 2011 after reporting smoking abstinence in 2010. The prevalence of relapse over the 12-month follow-up period was estimated in different subgroups. Multivariable logistic regression models were applied to determine factors associated to relapse.

**Results:** A total of 184 former smokers reported smoking relapse by 2011 (weighted prevalence: 6.8%. 95%CI: 5.7%-8.1%). Prevalence and odds of relapse were higher among young people compared to elders. Former smokers living in smoke-free homes had 60% lower odds of relapse compared with those living in homes that allowed smoking inside (aOR:0.40; 95%CI: 0.25-0.64). Regarding race/ethnicity, only Hispanics had significantly higher odds of relapse compared to whites (non-Hispanics). Odds of relapse were higher among never-married, widowed, divorced and separated individuals compared to the married group. Continuous smoking

1  
2  
3 cessation for 6 months or more significantly decreased odds of relapse among the  
4  
5 study sample.  
6

7 **Conclusions:** Wider health determinants influenced prevalence of smoking relapse  
8  
9 among US adults, highlighting the need for targeted interventions.  
10  
11  
12  
13  
14  
15  
16  
17  
18  
19  
20  
21  
22  
23  
24  
25  
26  
27  
28  
29  
30  
31  
32  
33  
34  
35  
36  
37  
38  
39  
40  
41  
42  
43  
44  
45  
46  
47  
48  
49  
50  
51  
52  
53  
54  
55  
56  
57  
58  
59  
60

For peer review only

## ARTICLE SUMMARY

### Strengths and limitations of this study

- The data was retrieved from a well structured survey, Tobacco Use Supplement-Current Population Survey (TUS-CPS), that is conducted regularly every 3 to 4 years in the US since 1992.
- The research project follows a secondary data analysis of a longitudinal study, which is compatible with the nature of the investigated subject as smoking relapse after a period of abstinence.
- A sensitivity analysis was conducted to validate the analysis and results of the research project.
- Further research could be conducted in the future considering a larger sample size and adding a qualitative part for investigating the motivations and other determinants that might lead to pick up smoking after cessation.

## LIST OF ABBREVIATIONS

|         |                                                  |
|---------|--------------------------------------------------|
| AIC     | Akaike information criterion                     |
| aOR     | Adjusted Odds Ratio                              |
| BIC     | Bayesian information criterion                   |
| CDC     | Centres of Disease Control and Prevention        |
| CHD     | Coronary Heart Disease                           |
| CI      | Confidence Interval                              |
| COPD    | Chronic Obstructive Pulmonary Diseases           |
| CPS     | Current Population Survey                        |
| CVD     | Cardiovascular Diseases                          |
| D.C     | District of Columbia                             |
| FCTC    | WHO Framework Convention on Tobacco Control      |
| GDP     | Gross Domestic Product                           |
| HP2020  | Healthy People 2020                              |
| N       | Number of observations                           |
| NCTP    | Non-Cigarette Tobacco Products                   |
| OR      | Unadjusted Odds Ratio                            |
| RR      | Relative Risk                                    |
| SFH     | Smoke Free Home                                  |
| TUS     | Tobacco Use Supplement                           |
| TUS-CPS | Tobacco Use Supplement-Current Population Survey |
| UK      | United Kingdom                                   |
| US      | United States of America                         |
| WHO     | World Health Organisation                        |

## INTRODUCTION

The World Health Organisation (WHO) estimates there are 1.1 billion current smokers worldwide [1]. According to the Centres for Disease Control and Prevention (CDC) 37.8 million adults were current smokers in the United States (US) in 2016, representing more than 15.5% of the total US population [2 3]. As a result, smoking causes 480,000 deaths annually in the US [4 5], while smoking related costs amount to approximately 1% of the country's Gross Domestic Product (GDP) [6 7].

The prevalence of smoking is determined by the proportion of the non-smoking population that initiates smoking, as well as the proportion of smokers who die or quit. Tobacco control measures aim to reduce smoking prevalence by preventing smoking initiation and increasing successful quit attempts, but long-term cessation is challenging. Although research on smoking cessation is abundant, most studies have explored factors associated with quit intentions and overall determinants of smoking cessation [8-10], with only a few focusing on "relapsing" former smokers who may restart smoking following a quit attempt.

Despite variations in the definitions used in the literature, smoking relapse essentially means picking up smoking after a period of abstinence [11 12]. A previous study estimated that on average, 75% of former smokers relapse at some point during their lifetime [12]. Within the first year of abstinence, relapse rates range from 60% to 90%, while two years of continuous cessation predicted 80% success rate for long-term quitting [13]. In this study, we use cigarette smoking to define relapse, as it is the most common method of tobacco use in the US and globally (>90%) (9). Thus, "smoking" refers to "cigarette smoking".



1  
2  
3 Although relapse has rarely been the specific focus of smoking cessation research, it  
4  
5 is reasonable to assume that at least some of the factors found to be associated with  
6  
7 smoking cessation overall also play a role in the process of relapse. These factors  
8  
9 include personal characteristics such as age [14], gender [15], race/ethnicity [16],  
10  
11 nicotine dependence [17], individual intentions, and motivations to quit [18 19].  
12  
13 Research has also identified the influence of living in a Smoke-Free Home (SFH) [20],  
14  
15 using Non-Cigarette Tobacco Products (NCTP) [21-23] and seeking specialist advice  
16  
17 while quitting [24]. A series of recent studies have also indicated a link between social  
18  
19 and community circumstances surrounding smokers, and their attitudes toward  
20  
21 smoking cessation [25], consistent with evidence on the relationship of smoking with  
22  
23 environmental and social-life factors [26 27]. However, hardly any of these studies has  
24  
25 assessed these associations for relapse in particular, which remains under-  
26  
27 researched.  
28  
29  
30  
31

32  
33 To fill this gap, this study aims to measure the prevalence of smoking relapse among  
34  
35 adult former smokers in the US, and to determine predictors of smoking relapse using  
36  
37 a nationally representative longitudinal sample.  
38  
39  
40  
41  
42  
43  
44  
45  
46  
47  
48  
49  
50  
51  
52  
53  
54  
55  
56  
57  
58  
59  
60

## METHODS

### Data Source

We conducted a secondary analysis using longitudinal data retrieved from the Tobacco Use Supplement-Current Population Survey (TUS-CPS). This survey has been conducted every 3 to 4 years in the US since 1992. It collects a broad range of data about the US population with topics varying from year to year. For this study, the cohort baseline data was collected in May 2010 and the follow-up survey was conducted in May 2011. It focused on the population's smoking behaviors and cessation attitudes. No other data was recorded between these two time points [28 29].

Selection of TUS-CPS respondents is designed to yield representative estimates for the US overall, as well as the 50 states and Washington, D.C. [30]. Since 2006, the survey has targeted US adults aged 18 years and above [29 30]. Data was collected by telephone or in-person interviews [30]. In the 2010-11 cohort 64% of participants completed the survey by telephone and 36% through in-person interviews [28 30]. Approximately 20% of the data was recorded by proxy, while the rest was self-reported [30]. For this research project, we only used data collected from self-respondents.

The analysis sample comprised individuals who reported being former smokers at baseline (May 2010 survey wave). Their smoking status was self-reported again after one year (May 2011). Relapse was defined as a failure to maintain smoking cessation between the two time points of data collection in the TUS-CPS surveys. Those who didn't report their smoking status in either wave or provided inconsistent data regarding having ever smoked between the two waves were excluded from the analysis. After applying the inclusion and exclusion criteria, the final study sample was 3,258, as illustrated in Figure 1.

## Measures

Smoking relapse status is the principle outcome of this study. Participants were asked to report their smoking status in 2010 and 2011; “*Do you now smoke cigarettes every day, some days, or not at all?*” The answers were categorized into a dichotomous variable (yes [every day or some days] vs no [not at all]). Those who responded “not at all” in 2010, but “every day” or “some days” in 2011 were considered to have relapsed.

Sociodemographic variables included age (18-24, 25-39, 40-65 and  $\geq 65$  years); gender (male, female); race/ethnicity (Hispanics, white non-Hispanics, black non-Hispanics, and other non-Hispanics); education level, determined by the highest accomplished level (<high school, high school, some college, defined as partially completed college education, and college or higher); and finally, socioeconomic status, reflected by annual family income (US\$ <20k, 20-49k, 50-99k and  $\geq 100$ k). Categorising these variables was based on previously published reports and studies using the TUS-CPS surveys [31].

This study used six months of continuous smoking abstinence as a cut-off point for defining sustained cessation (i.e., former smokers), guided by previous relevant studies [32]. The participants were asked in 2010 to answer: “*About how long has it been since you completely quit smoking cigarettes?*”[33]. Answers equal to or higher than 26 weeks or 180 days were counted as six months or longer. Participants who responded “don’t know” or refused to answer were excluded from the analysis (n=28).

In 2010, the participants were asked “*Which statement best describes the rules about smoking inside your home? No one is allowed to smoke anywhere inside your home; smoking is allowed in some places or sometimes inside your home; or smoking is*

1  
2  
3 *permitted anywhere inside your home*" [33]. Those who stated that no one is allowed  
4  
5 to smoke anywhere inside their home were classified as living in a SFH. All other  
6  
7 respondents were classified as living in a non-SFH.  
8  
9

10  
11 Four main NCTP were investigated in this study: cigar, regular pipes, water pipes and  
12  
13 smokeless tobacco. Participants were asked: *"Have you ever used any of the following*  
14  
15 *even one time? (The four investigated NCTP were mentioned in separate questions)"*.  
16  
17 A composite variable was created considering the use of any NCTP. Those who  
18  
19 reported ever use of any of those products were classified as "ever users". Those "ever  
20  
21 users" were also asked: *"Do you NOW use a "NCTP" every day, some days or not at*  
22  
23 *all?"*. The answers used to classify them into current and former users [33].  
24  
25  
26  
27  
28  
29

### 30 **Statistical analysis**

31  
32 Prevalence of smoking relapse was estimated among the whole cohort and within  
33  
34 each subgroup. Subgroups were compared between them using Chi-squared test.  
35  
36

37  
38 Logistic regression models were fitted to investigate unadjusted and adjusted  
39  
40 associations between smoking relapse and a number of factors. The dependent  
41  
42 variable of all logistic models was smoking relapse status. The independent variables  
43  
44 included in the final adjusted model followed a forward stepwise approach [34]. These  
45  
46 variables were included based on literature and guided by the outcomes of the  
47  
48 previously conducted Chi-squared tests and the univariate models. The Akaike  
49  
50 Information Criterion (AIC) and the Bayesian Information Criterion (BIC) values were  
51  
52 used to determine the final model specification. The significance level was set at 0.05.  
53  
54  
55  
56 Weights were used to account for the complexity of the TUS-CPS design. The analysis  
57  
58  
59  
60

1  
2  
3 was performed using STATA 13.1. Missing observations and those with inconsistent  
4  
5 ever smoking status in follow-up were excluded from the analysis.  
6  
7

8 Due to the varying definitions of relapse in the literature, sensitivity analyses were  
9  
10 conducted using different cut-off points for the duration of smoking cessation. Binary  
11  
12 variables using one and three months as cut-off points were included into two separate  
13  
14 models. Additionally, a separate model was fitted using four distinct periods of smoking  
15  
16 cessation: less than 1 month, 1-3 months, 3-6 months, and 6 months or more.  
17  
18 Reporting 30-days of abstinence was counted as one month; 13-weeks, or 90-days  
19  
20 were counted as 3-monhts; and 26-weeks or 180-days was considered as 6-months.  
21  
22  
23  
24  
25  
26  
27

### 28 **Patient and Public Involvement**

29  
30 It was not applicable to directly involve the public in this research project as it was a  
31  
32 secondary data analysis.  
33  
34  
35  
36  
37  
38  
39  
40  
41  
42  
43  
44  
45  
46  
47  
48  
49  
50  
51  
52  
53  
54  
55  
56  
57  
58  
59  
60

## RESULTS

Of the 18,499 participants who answered both TUS-CPS surveys in 2010 and 2011, only 3,258 met the inclusion and exclusion criteria and were considered in the final analysis. We excluded 55 participants from the analysis due to missing observations.

Table 1 illustrates the sociodemographic characteristics of the final study population based on their self-reported answers in the baseline survey. Prevalence estimates were 2.6%, 0.7%, 0.04%, and 2.5% for ever-use of cigars, regular pipes, water pipes, and smokeless tobacco products, respectively. Former users of any NCTP accounted for 37.2% among all participants.

Table 2 presents weighted prevalence of relapse among different subgroups. Out of 3,258 former smokers in 2010, a total of 184 reported smoking relapse by May 2011. They represented 6.8% (95% Confidence Interval [CI]: 5.7%-8.1%) of the cohort. Prevalence of smoking relapse was less than 20% in all subgroups, except among people aged 18-24 years (34.4%; 95%CI: 18.4%-54.9%); and among those who reported smoking abstinence for less than 6 months prior to the baseline survey (40.8%; 95%CI: 30.8%-51.6%). Within each variable, applying Chi-squared tests showed significant differences in prevalence of smoking relapse among subgroups, except by gender, education level and NCTP use.

Table 3 presents the results of the unadjusted and the final adjusted multivariable logistic regression model exploring associations of smoking relapse with individual and environmental factors among the study population. Hispanics were more likely to relapse compared to White non-Hispanics (adjusted odds ratio [aOR]: 2.05; 95% Confidence Interval [CI]: 1.03–4.08). The likelihood of relapse was also significantly associated with age. After adjusting for all the other variables, the youngest age group

1  
2  
3 (18-24 years) still had the highest odds of relapse among all sub-groups (aOR  
4 compared to the oldest group: 15.75; 95% CI: 4.23–58.42). Gender showed no  
5  
6 significant association with smoking relapse.  
7  
8

9  
10 Widowed and divorced former smokers had 2.77 (95% CI: 1.31-5.84) and 2.34 (95%  
11 CI: 1.41-3.85) times the odds of relapse compared to the married group, respectively.  
12  
13 Separated individuals had approximately four times the odds of relapse compared to  
14 married respondents (aOR: 4.16; 95%CI: 1.65-10.52). Living in a home where  
15 smoking inside was prohibited reduced the odds of relapse by 60% compared to living  
16 in homes where smoking was allowed (aOR: 0.40; 95% CI: 0.25-0.64).  
17  
18  
19  
20  
21  
22  
23  
24

25 Additionally, the adjusted model showed that smoking cessation for 6 months or more  
26 was a robust predictor of not relapsing, even after adjusting for the other variables.  
27  
28 Those who reported smoking abstinence for more than 6 months had 87% lower odds  
29 of relapse compared to the group who had quit smoking for less than 6 months at the  
30 time of the 2010 survey (aOR: 0.13; 95% CI: 0.07-0.23).  
31  
32  
33  
34  
35  
36

37 The sensitivity analyses using different cut-off points for the cessation period prior to  
38 the baseline survey (Supplementary tables 1-3) consistently showed that longer  
39 periods of prior abstinence were strongly associated with lower odds of relapse.  
40  
41  
42  
43  
44  
45  
46  
47  
48  
49  
50  
51  
52  
53  
54  
55  
56  
57  
58  
59  
60

1  
2  
3  
4  
5  
6  
7  
8  
9  
10  
11  
12  
13  
14  
15  
16  
17  
18  
19  
20  
21  
22  
23  
24  
25  
26  
27  
28  
29  
30  
31  
32  
33  
34  
35  
36  
37  
38  
39  
40  
41  
42  
43  
44  
45  
46  
47  
48  
49  
50  
51  
52  
53  
54  
55  
56  
57  
58  
59  
60

For peer review only



## DISCUSSION

Our analysis estimated the overall prevalence of smoking relapse among US former smokers between 2010 and 2011 at 6.8%, although this figure varied widely among population subgroups. Five factors had significant associations with relapse: duration of smoking cessation; living in SFHs; marital status; age; and race/ethnicity.

The estimated prevalence of relapse in this study was consistent with a previous meta-analysis reporting relapse after one year of smoking abstinence which reported this figure to be between 5-17% [35]. A study comparing US and UK former smokers found that adults living in the US were more likely to relapse in less than 28 days of abstinence [36]. Americans are slightly younger in age and more ethnically and racially diverse [37], which based on the findings of our study may explain some of these differences.

We found a significant association between duration of smoking cessation and relapse, which shows that the longer it's been since quitting, the easier it gets to remain quit. This highlights that quitters may require extra support during the critical early days after stopping. This association could be primarily explained by the addictive characteristics of nicotine, the effect of which are attenuated following a relatively short period of abstinence [38]. Moreover, psychosocial, financial and cultural factors increase the risk of relapse particularly during the first 6 months of quitting [32]. another study found that three months of continuous abstinence is the critical period after which the likelihood of successful quitting increases, which is consistent with our main and sensitivity analyses [39]. However, the cessation periods calculated in this study only refer to the time prior to the first data collection point. We did not have data on the length of the abstinence period between the baseline survey and the exact time of

1  
2  
3 relapse; hence, the actual period of abstinence may differ from what we used in our  
4  
5 analyses.  
6  
7

8 Living in a SFH decreased the odds of relapse for former smokers by 60%. Previous  
9  
10 studies have reported a 40% reduction in odds of relapse among similar groups [20].  
11  
12 A previous cohort study showed that members of households banning smoking had  
13  
14 12% higher likelihood to successfully quit smoking [20]. The impact of SFH on smoking  
15  
16 behaviors is consistent among disadvantaged populations, such as low-income  
17  
18 smokers [40], highlighting the influence of the immediate social and physical  
19  
20 environment on smoking behaviors. Along the same lines, having a partner who is a  
21  
22 former or current smoker may affect quitting decisions of the spouse [41]. Losing a  
23  
24 partner may demotivate quitters from successfully maintaining smoking cessation [18  
25  
26 19 32]. Additionally, being separated, divorced, or widowed might drive a general  
27  
28 feeling of insecurity and anxiety [42 43], which could explain their highest rates of  
29  
30 relapse found in our analysis.  
31  
32  
33  
34

35  
36 We also found that young adults were the most likely to relapse among all subgroups.  
37  
38 Young adults have more opportunities to smoke in groups during parties, festivals and  
39  
40 celebrations [44] and are more liable to peer pressure which makes them more  
41  
42 susceptible to smoking relapse after cessation [45]. Moreover younger smokers  
43  
44 underestimate the health consequences of smoking, which may weaken their  
45  
46 determination to quit [19]. Older individuals in our sample were also more likely to have  
47  
48 quit many years earlier, which, as highlighted before, is a robust predictor of sustained  
49  
50 abstinence.  
51  
52  
53  
54

55  
56 Hispanics had higher odds of relapse compared to non-Hispanic groups. Hispanics in  
57  
58 the US are more likely to be affected by health inequalities due to health insurance  
59  
60

1  
2  
3 challenges, economic burden and cultural sensitivity [46 47]. These disparities are  
4 manifested in and may be compounded by their lower success in quitting compared  
5 to Whites, which perpetuates social and health inequality in the US.  
6  
7  
8  
9

10 This study sheds light on smoking relapse and provides an insight into its predictors  
11 in a representative sample of the adult US population. Using a longitudinal study  
12 allowed us to explore smoking relapse over the course of twelve months. However,  
13 the TUS-CPS survey design has resulted in certain limitations. The questions were  
14 not originally designed to study smoking relapse as an independent outcome; for  
15 example, the exact time point of relapse was not reported which may have led to  
16 inaccurate estimates for some individuals; it is unclear whether any such inaccuracies  
17 may have followed a pattern that could influence the results. Relying on self-reported  
18 data and missing records placed additional challenges, as highlighted by the relatively  
19 high frequency of inconsistent reporting of ever smoker status between the two waves  
20 of the survey. As a result, although the original sample size of TUS-CPS is large, we  
21 ended up analysing a smaller subsample which reduced the precision of our  
22 estimates. Nonetheless, using weighted estimations allows us to generalise the results  
23 in the US adult population.  
24  
25  
26  
27  
28  
29  
30  
31  
32  
33  
34  
35  
36  
37  
38  
39  
40  
41  
42

43 Our analysis contributes to the limited literature on smoking relapse. Further studies  
44 could explore the magnitude of the problem among high risk groups and in other  
45 populations as well as more factors associated with relapse. Our findings can also  
46 inform tobacco control policies and specific interventions targeting those recent  
47 quitters who are at the highest risk of relapse, especially among vulnerable groups.  
48  
49  
50  
51  
52  
53  
54  
55  
56  
57  
58  
59  
60

## Conclusion

Smoking prevalence is a function of multiple parameters, such as initiation, cessation and relapse. Of these parameters, smoking relapse has been the least investigated. We found that age, race/ethnicity, marital status, duration of smoking cessation and living in SFHs were associated with smoking relapse among adults in the US, highlighting the need for targeted interventions to reduce relapse and increase long-term success of quit attempts.

For peer review only

## **FUNDING**

This research received no specific grant from any funding agency in the public, commercial or not-for-profit sectors.

## **DECLARATION OF INTERERSTTS**

The authors report no conflict of interest.

## **AUTHORS' CONTRIBUTIONS**

The first author, A.A, conducted the data analysis, reported results, and wrote the first draft of the study manuscript. The second and third authors, I.A and S.O, helped in cleaning the data and guided the analysis from their previous experience in analyzing data from the used survey. The fourth author, F.F, proposed with the first author the research question and provided support for designing and coordinating the research project, in addition to contributing in writing the final manuscript of the study. All authors significantly contributed to the research project and agreed on its all aspects.

1  
2  
3  
4  
5  
6  
7  
8  
9  
10  
11  
12  
13  
14  
15  
16  
17  
18  
19  
20  
21  
22  
23  
24  
25  
26  
27  
28  
29  
30  
31  
32  
33  
34  
35  
36  
37  
38  
39  
40  
41  
42  
43  
44  
45  
46  
47  
48  
49  
50  
51  
52  
53  
54  
55  
56  
57  
58  
59  
60

For peer review only

## REFERENCES

1. World Health Organization. Tobacco Fact sheet. Secondary Tobacco Fact sheet 2018, 9th March. <http://www.who.int/news-room/fact-sheets/detail/tobacco>.
2. National Center for Chronic Disease Prevention and Health Promotion (US) Office on Smoking and Health. The Health Consequences of Smoking-50 Years of Progress: A Report of the Surgeon General. Atlanta (GA), 2014.
3. Jamal A, Homa DM, O'Connor E, et al. Current cigarette smoking among adults—United States, 2005–2014. *Morbidity and mortality weekly report* 2015;64(44):1233-40
4. Committee on the Public Health Implications of Raising the Minimum Age for Purchasing Tobacco Products; Board on Population Health and Public Health Practice; Institute of Medicine; Bonnie RJ SK. Public Health Implications of Raising the Minimum Age of Legal Access to Tobacco Products. Washington (DC): National Academies Press (US) 2015
5. Centers for Disease Control and Prevention. Current Cigarette Smoking Among Adults in the United States. Secondary Current Cigarette Smoking Among Adults in the United States 2016. [https://www.cdc.gov/tobacco/data\\_statistics/fact\\_sheets/adult\\_data/cig\\_smoking/index.htm](https://www.cdc.gov/tobacco/data_statistics/fact_sheets/adult_data/cig_smoking/index.htm).
6. Ekpu VU, Brown AK. The Economic Impact of Smoking and of Reducing Smoking Prevalence: Review of Evidence. *Tobacco Use Insights* 2015;8:1-35 doi: 10.4137/TUI.S15628[published Online First: Epub Date]].
7. Centers for Disease Control and Prevention. Smoking-Attributable Mortality, Years of Potential Life Lost, and Productivity Losses --- United States, 2000--2004. Secondary Smoking-Attributable Mortality, Years of Potential Life Lost, and

- 1  
2  
3 Productivity Losses --- United States, 2000--2004 November 14, 2008.  
4  
5 <https://www.cdc.gov/mmwr/preview/mmwrhtml/mm5745a3.htm>.  
6  
7
8. Chezian C, Murthy S, Prasad S, et al. Exploring Factors that Influence Smoking  
9  
10 Initiation and Cessation among Current Smokers. Journal of clinical and  
11  
12 diagnostic research : JCDR 2015;9(5):LC08-LC12 doi:  
13  
14 10.7860/JCDR/2015/12047.5917[published Online First: Epub Date]].  
15  
16
9. Cantrell J, Bennett M, Mowery P, et al. Patterns in first and daily cigarette initiation  
17  
18 among youth and young adults from 2002 to 2015. PloS one  
19  
20 2018;13(8):e0200827-e27 doi: 10.1371/journal.pone.0200827[published  
21  
22 Online First: Epub Date]].  
23  
24  
25
10. Reyes-Guzman CM, Pfeiffer RM, Lubin J, et al. Determinants of Light and  
26  
27 Intermittent Smoking in the United States: Results from Three Pooled National  
28  
29 Health Surveys. Cancer epidemiology, biomarkers & prevention : a publication  
30  
31 of the American Association for Cancer Research, cosponsored by the  
32  
33 American Society of Preventive Oncology 2017;26(2):228-39 doi:  
34  
35 10.1158/1055-9965.EPI-16-0028[published Online First: Epub Date]].  
36  
37  
38
11. Arizona Department of Health Services. Smoking Relapse: What to Do If You  
39  
40 Start Smoking Again. Secondary Smoking Relapse: What to Do If You Start  
41  
42 Smoking Again 2017. [https://ashline.org/es/smoking-relapse-what-to-do-if-  
43  
44 you-start-smoking-again/](https://ashline.org/es/smoking-relapse-what-to-do-if-you-start-smoking-again/).  
45  
46  
47  
48
12. Cleveland Clinic. What Happens to Your Body When You Quit Smoking?  
49  
50 Secondary What Happens to Your Body When You Quit Smoking? 2018.  
51  
52 <https://health.clevelandclinic.org/happens-body-quit-smoking-infographic/>.  
53  
54  
55
13. Center for Advancing Health-American Association for the Advancement of  
56  
57 Science. Smoking relapse rates drop off sharply after two years. Secondary  
58  
59  
60



- 1  
2  
3 Smoking relapse rates drop off sharply after two years 27th Feb, 2002.  
4  
5 [https://www.eurekalert.org/pub\\_releases/2002-02/cfta-srr022702.php](https://www.eurekalert.org/pub_releases/2002-02/cfta-srr022702.php).  
6  
7
- 8 14. Centers for Disease Control and Prevention. Quitting Smoking. Secondary  
9  
10 Quitting Smoking 2017.  
11  
12 [https://www.cdc.gov/tobacco/data\\_statistics/fact\\_sheets/cessation/quitting/index.htm](https://www.cdc.gov/tobacco/data_statistics/fact_sheets/cessation/quitting/index.htm).  
13  
14  
15  
16
- 17 15. McKee Sherry A, Maciejewski Paul K, Falba T, Mazure Carolyn M. Sex  
18  
19 differences in the effects of stressful life events on changes in smoking status.  
20  
21 *Addiction* 2003;98(6):847-55 doi: 10.1046/j.1360-  
22  
23 0443.2003.00408.x[published Online First: Epub Date]].  
24  
25
- 26 16. Sakuma K-LK, Felicitas-Perkins JQ, Blanco L, et al. Tobacco use disparities by  
27  
28 racial/ethnic groups: California compared to the United States. *Preventive*  
29  
30 *medicine* 2016;91:224-32 doi: 10.1016/j.ypmed.2016.08.035[published Online  
31  
32 First: Epub Date]].  
33  
34
- 35 17. Vangeli E, Stapleton J, Smit Eline S, Borland R, West R. Predictors of attempts  
36  
37 to stop smoking and their success in adult general population samples: a  
38  
39 systematic review. *Addiction* 2011;106(12):2110-21 doi: 10.1111/j.1360-  
40  
41 0443.2011.03565.x[published Online First: Epub Date]].  
42  
43
- 44 18. Borland R, Yong H-H, Balmford J, et al. Motivational factors predict quit attempts  
45  
46 but not maintenance of smoking cessation: Findings from the International  
47  
48 Tobacco Control Four country project. *Nicotine & Tobacco Research*  
49  
50 2010;12(suppl\_1):S4-S11 doi: 10.1093/ntr/ntq050[published Online First:  
51  
52 Epub Date]].  
53  
54
- 55 19. El-Khoury Lesueur F, Bolze C, Melchior M. Factors associated with successful  
56  
57 vs. unsuccessful smoking cessation: Data from a nationally representative  
58  
59  
60

- 1  
2  
3 study. Addictive Behaviors 2018;80:110-15 doi:  
4  
5 <https://doi.org/10.1016/j.addbeh.2018.01.016>[published Online First: Epub  
6  
7 Date]].  
8  
9
- 10 20. Hyland A, Higbee C, Travers MJ, et al. Smoke-free homes and smoking  
11  
12 cessation and relapse in a longitudinal population of adults. Nicotine &  
13  
14 Tobacco Research 2009;11(6):614-18 doi: 10.1093/ntr/ntp022[published  
15  
16 Online First: Epub Date]].  
17  
18
- 19 21. Connor RJ. Non-cigarette tobacco products: what have we learnt and where are  
20  
21 we headed? Tobacco Control 2012;21(2):181  
22  
23
- 24 22. Cornacchione Ross J, Noar SM, Sutfin EL. Systematic Review of Health  
25  
26 Communication for Non-Cigarette Tobacco Products. Health Communication  
27  
28 2017:1-9 doi: 10.1080/10410236.2017.1407274[published Online First: Epub  
29  
30 Date]].  
31  
32
- 33 23. Zhuang Y-L, Cummins SE, Y Sun J, Zhu S-H. Long-term e-cigarette use and  
34  
35 smoking cessation: a longitudinal study with US population. Tobacco Control  
36  
37 2016;25(Suppl 1):i90  
38  
39
- 40 24. Song F, Maskrey V, Blyth A, et al. Differences in Longer-Term Smoking  
41  
42 Abstinence After Treatment by Specialist or Nonspecialist Advisors:  
43  
44 Secondary Analysis of Data From a Relapse Prevention Trial. Nicotine &  
45  
46 Tobacco Research 2016;18(5):1061-66 doi: 10.1093/ntr/ntv148[published  
47  
48 Online First: Epub Date]].  
49  
50
- 51 25. Bandiera FC, Atem F, Ma P, Businelle MS, Kendzor DE. Post-quit stress  
52  
53 mediates the relation between social support and smoking cessation among  
54  
55 socioeconomically disadvantaged adults. Drug & Alcohol Dependence  
56  
57  
58  
59  
60

- 2016;163:71-76 doi: 10.1016/j.drugalcdep.2016.03.023[published Online First: Epub Date]].
26. General ARotS. Social, Environmental, Cognitive, and Genetic Influences on the Use of Tobacco Among Youth. Secondary Social, Environmental, Cognitive, and Genetic Influences on the Use of Tobacco Among Youth 2012. <https://www.ncbi.nlm.nih.gov/books/NBK99236/>.
27. Petraitis J, Flay BR, Miller TQ. Reviewing theories of adolescent substance use: Organizing pieces in the puzzle. *Psychological Bulletin* 1995;117(1):67-86 doi: 10.1037/0033-2909.117.1.67[published Online First: Epub Date]].
28. National Cancer Institute DoCCPS. What is the TUS-CPS? Secondary What is the TUS-CPS? 2018. <https://cancercontrol.cancer.gov/brp/tcrb/tus-cps/>.
29. National Cancer Institute U. Tobacco Use Supplement. Secondary Tobacco Use Supplement January 2018. [https://cancercontrol.cancer.gov/brp/tcrb/tus-cps/TUS-CPS\\_fact\\_sheet.pdf?file=/studies/tus-cps/TUS-CPS\\_fact\\_sheet.pdf](https://cancercontrol.cancer.gov/brp/tcrb/tus-cps/TUS-CPS_fact_sheet.pdf?file=/studies/tus-cps/TUS-CPS_fact_sheet.pdf).
30. Office of Disease Prevention and Health Promotion. Tobacco Use Supplement-Current Population Survey. Secondary Tobacco Use Supplement-Current Population Survey 2012. <https://www.healthypeople.gov/2020/data-source/tobacco-use-supplement-current-population-survey>.
31. National Cancer Institute-Division of Cancer Control & Population Sciences. Reports & Publications Using the TUS-CPS. Secondary Reports & Publications Using the TUS-CPS 2018. <https://cancercontrol.cancer.gov/brp/tcrb/tus-cps/publications.html>.
32. Yong H-H, Borland R, Cummings KM, Partos T. Do predictors of smoking relapse change as a function of duration of abstinence? Findings from the United States, Canada, United Kingdom and Australia. *Addiction*

- 1  
2  
3 2018;113(7):1295-304 doi: 10.1111/add.14182[published Online First: Epub  
4 Date]].  
5  
6  
7  
8 33. National Cancer Institute - Tobacco Control Research Branch. 2010-2011  
9  
10 Tobacco Use Supplement to the Current Population Survey. Secondary 2010-  
11  
12 2011 Tobacco Use Supplement to the Current Population Survey 2013.  
13  
14 [https://cancercontrol.cancer.gov/brp/tcrb/tus-](https://cancercontrol.cancer.gov/brp/tcrb/tus-cps/surveys/tuscps_english_2010.pdf)  
15  
16 [cps/surveys/tuscps\\_english\\_2010.pdf](https://cancercontrol.cancer.gov/brp/tcrb/tus-cps/surveys/tuscps_english_2010.pdf).  
17  
18  
19 34. Bursac Z, Gauss CH, Williams DK, Hosmer DW. Purposeful selection of  
20  
21 variables in logistic regression. *Source Code Biol Med* 2008;3:17 doi:  
22  
23 10.1186/1751-0473-3-17[published Online First: Epub Date]].  
24  
25  
26 35. Hughes JR, Peters EN, Naud S. Relapse to smoking after 1 year of abstinence:  
27  
28 a meta-analysis. *Addict Behav* 2008;33(12):1516-20 doi:  
29  
30 10.1016/j.addbeh.2008.05.012[published Online First: Epub Date]].  
31  
32  
33 36. Gibson JE, Murray RL, Borland R, et al. The impact of the United Kingdom's  
34  
35 national smoking cessation strategy on quit attempts and use of cessation  
36  
37 services: Findings from the International Tobacco Control Four Country  
38  
39 Survey. *Nicotine & Tobacco Research* 2010;12:S64-S71 doi:  
40  
41 10.1093/ntr/ntq119[published Online First: Epub Date]].  
42  
43  
44 37. Tunstall RK. Americans and Britons: Key Population Data from the Last Three  
45  
46 U.S. and U.K. Censuses. Brookings Website: Brookings Inc, 2005.  
47  
48  
49 38. Georgiadou C, Lavdaniti M, Psychogiou M, Tzenalis A, Sgantzos M, Sapountzi-  
50  
51 Krepia D. Factors Affecting the Decision to Quit Smoking of the Participants of  
52  
53 a Hospital-Based Smoking Cessation Program in Greece. *Journal of Caring*  
54  
55 *Sciences* 2015;4(1):1-11 doi: 10.5681/jcs.2015.001[published Online First:  
56  
57 Epub Date]].  
58  
59  
60

- 1  
2  
3 39. Burke MV, Hays JT, Ebbert JO. Varenicline for smoking cessation: a narrative  
4 review of efficacy, adverse effects, use in at-risk populations, and adherence.  
5 Patient Prefer Adher 2016;10:435-41 doi: 10.2147/Ppa.S83469[published  
6 Online First: Epub Date]].  
7  
8  
9  
10  
11  
12 40. Vijayaraghavan M, Messer K, White MM, Pierce JP. The effectiveness of  
13 cigarette price and smoke-free homes on low-income smokers in the United  
14 States. Am J Public Health 2013;103(12):2276-83 doi:  
15 10.2105/AJPH.2013.301300[published Online First: Epub Date]].  
16  
17  
18  
19  
20  
21 41. Takagi D, Kondo N, Takada M, Hashimoto H. Differences in spousal influence on  
22 smoking cessation by gender and education among Japanese couples. BMC  
23 Public Health 2014;14:1184 doi: 10.1186/1471-2458-14-1184[published  
24 Online First: Epub Date]].  
25  
26  
27  
28  
29  
30 42. Rodriguez LM, DiBello AM, Overup CS, Neighbors C. The Price of Distrust:  
31 Trust, Anxious Attachment, Jealousy, and Partner Abuse. Partner Abuse  
32 2015;6(3):298-319 doi: 10.1891/1946-6560.6.3.298[published Online First:  
33 Epub Date]].  
34  
35  
36  
37  
38  
39 43. Institute of Medicine (US) Committee for the Study of Health Consequences of  
40 the Stress of Bereavement. Reactions to Particular Types of Bereavement. In:  
41 Osterweis M, Solomon F, Green M, eds. Bereavement: Reactions,  
42 Consequences, and Care. Washington (DC), 1984.  
43  
44  
45  
46  
47  
48 44. National Center for Chronic Disease Prevention and Health Promotion (US)  
49 Office on Smoking and Health. Social, Environmental, Cognitive, and Genetic  
50 Influences on the Use of Tobacco Among Youth. Secondary Social,  
51 Environmental, Cognitive, and Genetic Influences on the Use of Tobacco  
52 Among Youth 2012. <https://www.ncbi.nlm.nih.gov/books/NBK99236/>.  
53  
54  
55  
56  
57  
58  
59  
60

- 1  
2  
3 45. Collins SE, Witkiewitz K, Kirouac M, Marlatt GA. Preventing Relapse Following  
4  
5 Smoking Cessation. *Current cardiovascular risk reports* 2010;4(6):421-28 doi:  
6  
7 10.1007/s12170-010-0124-6[published Online First: Epub Date]].  
8  
9  
10 46. Vega WA, Rodriguez MA, Gruskin E. Health disparities in the Latino population.  
11  
12 *Epidemiol Rev* 2009;31:99-112 doi: 10.1093/epirev/mxp008[published Online  
13  
14 First: Epub Date]].  
15  
16  
17 47. Velasco-Mondragon E, Jimenez A, Palladino-Davis AG, Davis D, Escamilla-  
18  
19 Cejudo JA. Hispanic health in the USA: a scoping review of the literature.  
20  
21 *Public Health Rev* 2016;37:31 doi: 10.1186/s40985-016-0043-2[published  
22  
23 Online First: Epub Date]].  
24  
25  
26  
27  
28  
29  
30  
31  
32  
33  
34  
35  
36  
37  
38  
39  
40  
41  
42  
43  
44  
45  
46  
47  
48  
49  
50  
51  
52  
53  
54  
55  
56  
57  
58  
59  
60

**Table 1:** Descriptive statistics of the baseline former smokers' cohort, based on the self-reported answers in the TUS-CPS 2010 survey, in the US. (N=3,258)

|                                                  | N <sup>1</sup> | Weighted % |
|--------------------------------------------------|----------------|------------|
| <b>Sex/Gender</b>                                |                |            |
| Male                                             | 1639           | 57.3%      |
| Female                                           | 1619           | 42.7%      |
| <b>Age group (years)</b>                         |                |            |
| 65+                                              | 1078           | 31.5%      |
| 40-64                                            | 1672           | 48.3%      |
| 25-39                                            | 472            | 17.3%      |
| 18-24                                            | 36             | 2.9%       |
| <b>Race/Ethnicity</b>                            |                |            |
| White (non-Hispanics)                            | 2859           | 83.9%      |
| Black (non-Hispanics)                            | 172            | 6.0%       |
| Other (non-Hispanics)                            | 101            | 3.6%       |
| Hispanics                                        | 126            | 6.6%       |
| <b>Annual family income (USD)</b>                |                |            |
| <20k                                             | 494            | 15.6%      |
| 20-49K                                           | 1110           | 34.8%      |
| 50-99K                                           | 1073           | 32.4%      |
| 100k+                                            | 581            | 17.3%      |
| <b>Education level</b>                           |                |            |
| <High school                                     | 356            | 11.8%      |
| High school                                      | 977            | 29.4%      |
| Some college <sup>2</sup>                        | 1574           | 48.1%      |
| College+ <sup>3</sup>                            | 351            | 10.8%      |
| <b>Marital status</b>                            |                |            |
| Married                                          | 1872           | 57.7%      |
| Widowed                                          | 402            | 11.3%      |
| Divorced                                         | 576            | 16.3%      |
| Separated                                        | 48             | 1.9%       |
| Never married                                    | 360            | 12.7%      |
| <b>Non-Cigarette Tobacco Products (NCTP) use</b> |                |            |
| Never use                                        | 1920           | 57.2%      |
| Current user                                     | 159            | 5.6%       |
| Former user                                      | 1144           | 37.2%      |
| <b>Smoking cessation period</b>                  |                |            |
| < 6 Months                                       | 127            | 4.8%       |
| ≥ 6 Months                                       | 3103           | 95.2%      |
| <b>Living in smoke-free home (SFH)</b>           |                |            |
| Non-SFH                                          | 463            | 14.6%      |
| SFH                                              | 2738           | 85.4%      |
| <b>Smoke-free workplace</b>                      |                |            |
| Indoor smoking-allowed                           | 175            | 6.3%       |
| Indoor smoke-free                                | 950            | 31.9%      |
| Outdoor                                          | 125            | 4.7%       |

|              |             |             |
|--------------|-------------|-------------|
| Undetermined | 208         | 6.6%        |
| Not-employed | 1530        | 50.5%       |
| <b>Total</b> | <b>3258</b> | <b>100%</b> |

1  
2  
3  
4  
5  
6  
7 *1: Number of participants. 2: Partially completed college education. 3: Completed a college education or higher.*

8  
9 *- Counts and percentages in this table include only completed answers in each variable, excluding missing observations; 28 were missed in smoking cessation period, 57 in SFH, and 270 in smoke-free workplace.*

10  
11  
12  
13  
14  
15  
16  
17  
18  
19  
20  
21  
22  
23  
24  
25  
26  
27  
28  
29  
30  
31  
32  
33  
34  
35  
36  
37  
38  
39  
40  
41  
42  
43  
44  
45  
46  
47  
48  
49  
50  
51  
52  
53  
54  
55  
56  
57  
58  
59  
60

For peer review only



**Table 2:** Weighted prevalence of smoking relapse former smokers in the TUS\_CPS 2010-11 cohort surveys in the US.

|                                                  | N <sup>1</sup> | Weighted prevalence of relapse | 95% CI <sup>4</sup> |             |
|--------------------------------------------------|----------------|--------------------------------|---------------------|-------------|
| <b>Overall<sup>5</sup> (N=3258)</b>              | <b>184</b>     | <b>6.8%</b>                    | <b>5.7%</b>         | <b>8.1%</b> |
| <b>Sex/Gender</b>                                |                |                                |                     |             |
| Male                                             | 87             | 6.5%                           | 5.0%                | 8.4%        |
| Female                                           | 97             | 7.2%                           | 5.8%                | 9.0%        |
| <b>Age group (years)</b>                         |                |                                |                     |             |
| 65+                                              | 18             | 1.8%                           | 1.0%                | 2.9%        |
| 40-64                                            | 108            | 6.6%                           | 5.3%                | 8.1%        |
| 25-39                                            | 47             | 11.9%                          | 8.8%                | 15.8%       |
| 18-24                                            | 11             | 34.4%                          | 18.4%               | 54.9%       |
| <b>Race/Ethnicity</b>                            |                |                                |                     |             |
| White (non-Hispanics)                            | 147            | 6.1%                           | 5.0%                | 7.4%        |
| Black (non-Hispanics)                            | 14             | 10.0%                          | 5.6%                | 17.3%       |
| Other (non-Hispanics)                            | 8              | 5.8%                           | 2.4%                | 13.0%       |
| Hispanics                                        | 15             | 13.7%                          | 8.1%                | 22.2%       |
| <b>Annual family income (USD)</b>                |                |                                |                     |             |
| <20k                                             | 40             | 11.5%                          | 7.9%                | 16.4%       |
| 20-49K                                           | 66             | 7.2%                           | 5.4%                | 9.5%        |
| 50-99K                                           | 52             | 5.2%                           | 3.8%                | 7.1%        |
| 100k+                                            | 26             | 4.7%                           | 3.1%                | 7.2%        |
| <b>Education level</b>                           |                |                                |                     |             |
| <High school                                     | 24             | 8.6%                           | 5.5%                | 13.2%       |
| High school                                      | 57             | 7.0%                           | 5.1%                | 9.7%        |
| Some college <sup>2</sup>                        | 88             | 6.7%                           | 5.3%                | 8.6%        |
| College+ <sup>3</sup>                            | 15             | 4.4%                           | 2.5%                | 7.8%        |
| <b>Marital status</b>                            |                |                                |                     |             |
| Married                                          | 82             | 4.7%                           | 3.7%                | 5.9%        |
| Widowed                                          | 18             | 4.8%                           | 2.9%                | 7.9%        |
| Divorced                                         | 43             | 8.4%                           | 5.9%                | 11.7%       |
| Separated                                        | 8              | 18.7%                          | 9.1%                | 34.6%       |
| Never married                                    | 33             | 14.4%                          | 9.6%                | 21.0%       |
| <b>Non-Cigarette Tobacco Products (NCTP) use</b> |                |                                |                     |             |
| Never use                                        | 115            | 6.9%                           | 5.7%                | 8.5%        |
| Current user                                     | 12             | 7.4%                           | 3.7%                | 14.2%       |
| Former user                                      | 52             | 5.9%                           | 4.2%                | 8.5%        |
| <b>Smoking cessation period</b>                  |                |                                |                     |             |
| < 6 Months                                       | 56             | 40.8%                          | 30.8%               | 51.6%       |
| ≥ 6 Months                                       | 124            | 4.9%                           | 4.0%                | 6.0%        |
| <b>Living in smoke-free home (SFH)</b>           |                |                                |                     |             |
| Smoking allowed                                  | 49             | 13.1%                          | 9.4%                | 17.9%       |
| smoke-free home                                  | 127            | 5.3%                           | 4.4%                | 6.5%        |
| <b>Smoke-free workplace</b>                      |                |                                |                     |             |
| Indoor smoking-allowed                           | 15             | 9.6%                           | 4.8%                | 18.3%       |
| Indoor smoke-free                                | 60             | 7.9%                           | 5.8%                | 10.5%       |

|              |    |       |      |       |
|--------------|----|-------|------|-------|
| Outdoor      | 14 | 12.8% | 7.0% | 22.4% |
| Undetermined | 13 | 5.8%  | 3.0% | 10.9% |
| Not-employed | 68 | 5.3%  | 4.0% | 7.0%  |

1  
2  
3  
4  
5  
6  
7  
8  
9  
10  
11  
12  
13  
14  
15  
16  
17  
18  
19  
20  
21  
22  
23  
24  
25  
26  
27  
28  
29  
30  
31  
32  
33  
34  
35  
36  
37  
38  
39  
40  
41  
42  
43  
44  
45  
46  
47  
48  
49  
50  
51  
52  
53  
54  
55  
56  
57  
58  
59  
60

*1: Number of participants. 2: Partially completed college education. 3: Completed a college education or higher. 4: Confidence Interval. 5: Overall prevalence of relapse among all participants.*

For peer review only

**Table 3:** Predictors of smoking relapse among the US adult former smokers, data extracted from the TUS-CPS 2010-11 cohort surveys (N=3182).

| Independent Variables                    | Unadjusted OR <sup>2</sup><br>(95% CI) | Adjusted OR <sup>2</sup><br>(95% CI) |
|------------------------------------------|----------------------------------------|--------------------------------------|
| <b>Age group (years)</b>                 |                                        |                                      |
| 65+ (ref) <sup>3</sup>                   | 1                                      | 1                                    |
| 40-64                                    | 3.95 (2.23-6.99)                       | 4.28 (2.19-8.37)                     |
| 25-39                                    | 7.56 (4.05-14.10)                      | 8.09 (3.72-17.62)                    |
| 18-24                                    | 29.40 (10.89-79.37)                    | 15.75 (4.25-58.42)                   |
| <b>Sex/Gender</b>                        |                                        |                                      |
| Female (ref) <sup>3</sup>                | 1                                      | 1                                    |
| Male                                     | 0.89 (0.62-1.28)                       | 0.91 (0.61-1.37)                     |
| <b>Smoking cessation Period</b>          |                                        |                                      |
| < 6 Months (ref) <sup>3</sup>            | 1                                      | 1                                    |
| ≥ 6 Months                               | 0.08 (0.05-0.12)                       | 0.13 (0.07-0.23)                     |
| <b>Living in SFH<sup>4</sup></b>         |                                        |                                      |
| Non-SFH (ref) <sup>3</sup>               | 1                                      | 1                                    |
| SFH                                      | 0.37 (0.25-0.58)                       | 0.40 (0.25-0.64)                     |
| <b>Marital status</b>                    |                                        |                                      |
| Married (ref) <sup>3</sup>               | 1                                      | 1                                    |
| Widowed                                  | 1.03 (0.58-1.86)                       | 2.77 (1.31-5.84)                     |
| Divorced                                 | 1.86 (1.18-2.92)                       | 2.34 (1.42-3.85)                     |
| Separated                                | 4.67 (1.96-11.18)                      | 4.16 (1.65-10.52)                    |
| Never married                            | 3.42 (2.03-5.79)                       | 1.48 (0.82-2.67)                     |
| <b>Race/Ethnicity</b>                    |                                        |                                      |
| White (non-Hispanics) (ref) <sup>3</sup> | 1                                      | 1                                    |
| Black (non-Hispanics)                    | 1.72 (0.88-3.36)                       | 0.94 (0.44-2.02)                     |
| Other (non-Hispanics)                    | 0.94 (0.38-2.36)                       | 0.81 (0.30-2.19)                     |
| Hispanics                                | 2.45 (1.31-4.57)                       | 2.05 (1.03-4.08)                     |

<sup>1</sup>: Confidence interval. <sup>2</sup>: Odds ratio. <sup>3</sup>: Reference group. <sup>4</sup>: Smoke-Free Home.

- Smoking relapse is the only outcome.

- The odds ratios in this table are all weighted.

- Adjusted odds ratio are adjusted for all variables in the table.

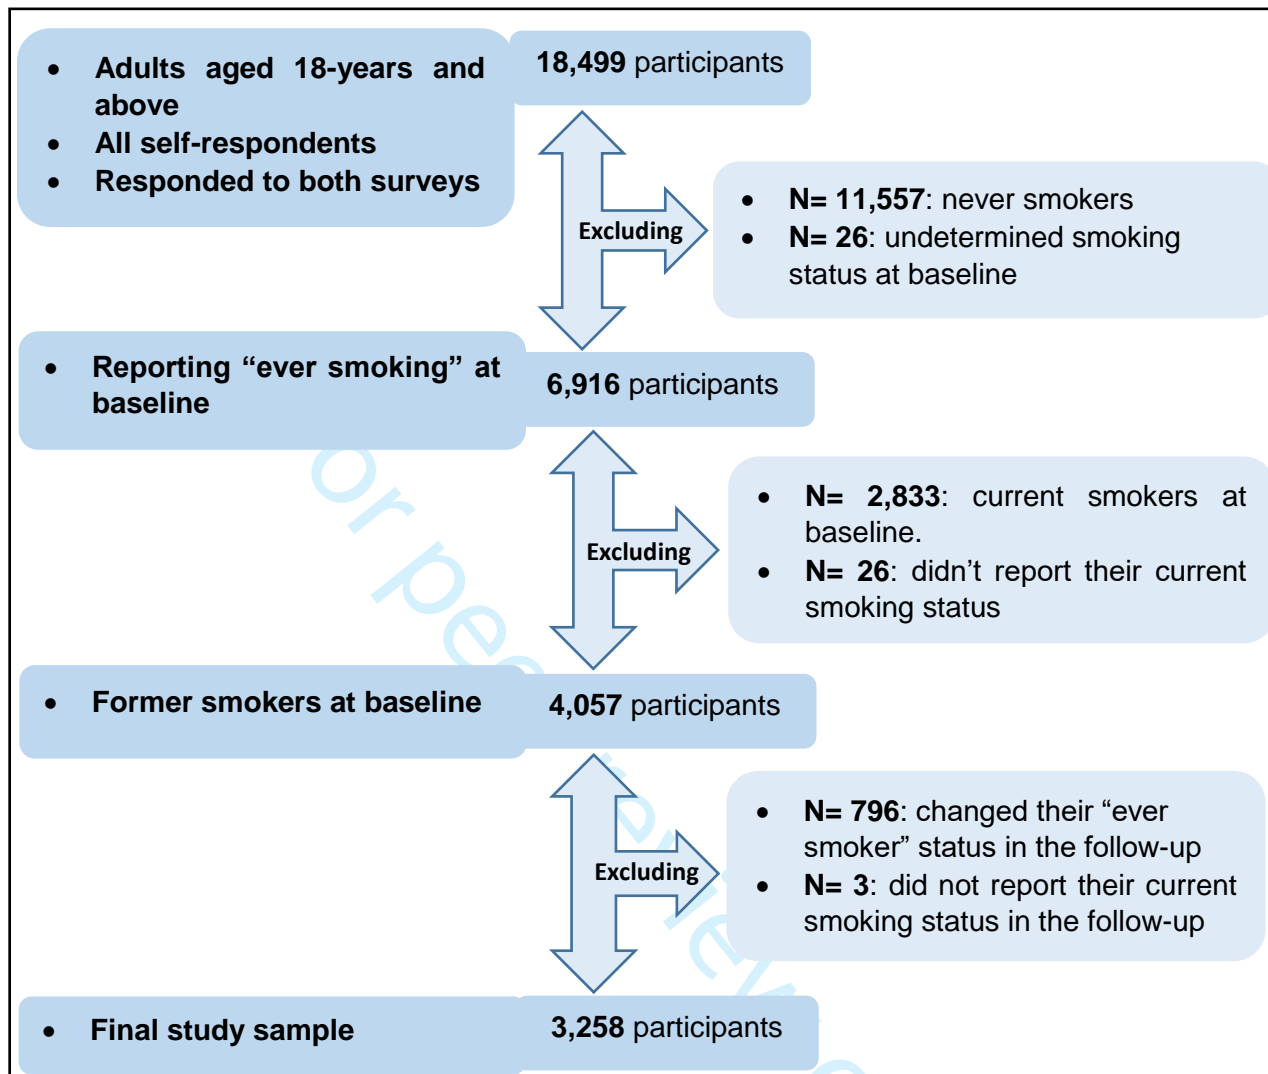

**Supplementary table-1:** Results of a multivariate logistic regression model for exploring predictors of smoking relapse among the US adult smokers using 1-month as a cut-off point for stratifying the smoking cessation period.

| Independent Variables                    | Adjusted OR <sup>1</sup> | 95% CI <sup>2</sup> |       |
|------------------------------------------|--------------------------|---------------------|-------|
|                                          |                          | From                | To    |
| <b>Age group (years)</b>                 |                          |                     |       |
| 65+ (ref) <sup>3</sup>                   | 1                        | -                   | -     |
| 40-64                                    | 4.55                     | 2.39                | 8.68  |
| 25-39                                    | 9.32                     | 4.47                | 19.43 |
| 18-24                                    | 22.82                    | 7.45                | 69.90 |
| <b>Sex/Gender</b>                        |                          |                     |       |
| Female (ref) <sup>3</sup>                | 1                        | -                   | -     |
| Male                                     | 0.89                     | 0.60                | 1.31  |
| <b>Smoking cessation Period*</b>         |                          |                     |       |
| < 1 Month (ref) <sup>3</sup>             | 1                        | -                   | -     |
| ≥ 1 Month                                | 0.08                     | 0.03                | 0.17  |
| <b>Living in SFH<sup>4</sup></b>         |                          |                     |       |
| Non-SFH <sup>4</sup>                     | 1                        | -                   | -     |
| SFH <sup>4</sup>                         | 0.44                     | 0.28                | 0.69  |
| <b>Marital status</b>                    |                          |                     |       |
| Married (ref) <sup>3</sup>               | 1                        | -                   | -     |
| Widowed                                  | 2.79                     | 1.35                | 5.77  |
| Divorced                                 | 2.34                     | 1.45                | 3.78  |
| Separated                                | 3.89                     | 1.49                | 10.16 |
| Never married                            | 1.62                     | 0.96                | 2.74  |
| <b>Race/Ethnicity</b>                    |                          |                     |       |
| White (non-Hispanics) (ref) <sup>3</sup> | 1                        | -                   | -     |
| Black (non-Hispanics)                    | 1.01                     | 0.46                | 2.23  |
| Other (non-Hispanics)                    | 0.74                     | 0.25                | 2.18  |
| Hispanics                                | 2.20                     | 1.15                | 4.21  |

1: Odds ratio. 2: Confidence interval. 3: Reference group. 4: Smoke-Free Home. \*: the variable of interest in the sensitivity analysis.

- Smoking relapse is the only outcome.
- Total number of observations considered in the model was 3,182.
- The odds ratios in this table are all weighted and adjusted to all included variables
- All the values in the table are rounded to two decimal places, except for the p-values.

**Supplementary table-2:** Results of a multivariate logistic regression model for exploring predictors of smoking relapse among the US adult smokers using 3-months as a cut-off point for stratifying the smoking cessation period.

| Independent Variables                    | Adjusted OR <sup>1</sup> | 95% CI <sup>2</sup> |             |
|------------------------------------------|--------------------------|---------------------|-------------|
|                                          |                          | From                | To          |
| <b>Age group (years)</b>                 |                          |                     |             |
| 65+ (ref) <sup>3</sup>                   | 1.00                     | -                   | -           |
| 40-64                                    | 4.53                     | 2.33                | 8.81        |
| 25-39                                    | 8.45                     | 3.91                | 18.29       |
| 18-24                                    | 19.58                    | 5.61                | 68.31       |
| <b>Sex/Gender</b>                        |                          |                     |             |
| Female (ref) <sup>3</sup>                | 1.00                     | -                   | -           |
| Male                                     | 0.94                     | 0.63                | 1.40        |
| <b>Smoking cessation Period*</b>         |                          |                     |             |
| < 3 Months (ref) <sup>3</sup>            | <b>1.00</b>              | -                   | -           |
| ≥ 3 Months                               | <b>0.09</b>              | <b>0.04</b>         | <b>0.17</b> |
| <b>Living in SFH<sup>4</sup></b>         |                          |                     |             |
| Non-SFH <sup>4</sup> (ref) <sup>3</sup>  | 1.00                     | -                   | -           |
| SFH <sup>4</sup>                         | 0.41                     | 0.26                | 0.65        |
| <b>Marital status</b>                    |                          |                     |             |
| Married (ref) <sup>3</sup>               | 1.00                     | -                   | -           |
| Widowed                                  | 2.77                     | 1.32                | 5.79        |
| Divorced                                 | 2.20                     | 1.33                | 3.64        |
| Separated                                | 3.92                     | 1.53                | 10.02       |
| Never married                            | 1.51                     | 0.85                | 2.67        |
| <b>Race/Ethnicity</b>                    |                          |                     |             |
| White (non-Hispanics) (ref) <sup>3</sup> | 1.00                     | -                   | -           |
| Black (non-Hispanics)                    | 0.87                     | 0.37                | 2.07        |
| Other (non-Hispanics)                    | 0.83                     | 0.29                | 2.39        |
| Hispanics                                | 2.06                     | 1.06                | 4.01        |

1: Odds ratio. 2: Confidence interval. 3: Reference group. 4: Smoke-Free Home. \*: the variable of interest in the sensitivity analysis.

- Smoking relapse is the only outcome.
- Total number of observations considered in the model was 3,182.
- The odds ratios in this table are all weighted and adjusted to all included variables
- All the values in the table are rounded to two decimal places, except for the p-values.

**Supplementary table-3:** Results of a multivariate logistic regression model for exploring predictors of smoking relapse among the US adult smokers using 1, 3 and 6-months as cut-off points for stratifying the smoking cessation period.

| Independent Variables                    | Adjusted OR <sup>1</sup> | 95% CI <sup>2</sup> |             |
|------------------------------------------|--------------------------|---------------------|-------------|
|                                          |                          | From                | To          |
| <b>Age group (years)</b>                 |                          |                     |             |
| 65+ (ref) <sup>3</sup>                   | 1.00                     | -                   | -           |
| 40-64                                    | 4.40                     | 2.25                | 8.61        |
| 25-39                                    | 8.20                     | 3.76                | 17.89       |
| 18-24                                    | 16.96                    | 4.64                | 62.01       |
| <b>Sex/Gender</b>                        |                          |                     |             |
| Female (ref) <sup>3</sup>                | 1.00                     | -                   | -           |
| Male                                     | 0.94                     | 0.62                | 1.41        |
| <b>Smoking cessation Period*</b>         |                          |                     |             |
| < 1 Month (ref) <sup>3</sup>             | <b>1.00</b>              | -                   | -           |
| <b>1 - 3 Months</b>                      | <b>0.61</b>              | <b>0.18</b>         | <b>2.03</b> |
| <b>3 - 6 Months</b>                      | <b>0.21</b>              | <b>0.06</b>         | <b>0.74</b> |
| <b>≥ 6 Months</b>                        | <b>0.06</b>              | <b>0.03</b>         | <b>0.14</b> |
| <b>Living in SFH<sup>4</sup></b>         |                          |                     |             |
| Non-SFH <sup>4</sup> (ref) <sup>3</sup>  | 1.00                     | -                   | -           |
| SFH <sup>4</sup>                         | 0.41                     | 0.26                | 0.65        |
| <b>Marital status</b>                    |                          |                     |             |
| Married (ref) <sup>3</sup>               | 1.00                     | -                   | -           |
| Widowed                                  | 2.80                     | 1.33                | 5.91        |
| Divorced                                 | 2.29                     | 1.38                | 3.79        |
| Separated                                | 3.94                     | 1.52                | 10.21       |
| Never married                            | 1.47                     | 0.81                | 2.65        |
| <b>Race/Ethnicity</b>                    |                          |                     |             |
| White (non-Hispanics) (ref) <sup>3</sup> | 1.00                     | -                   | -           |
| Black (non-Hispanics)                    | 0.88                     | 0.38                | 2.06        |
| Other (non-Hispanics)                    | 0.84                     | 0.30                | 2.37        |
| Hispanics                                | 2.02                     | 1.02                | 3.99        |

<sup>1</sup>: Odds ratio. <sup>2</sup>: Confidence interval. <sup>3</sup>: Reference group. <sup>4</sup>: Smoke-Free Home. \*: the variable of interest in the sensitivity analysis.

- Smoking relapse is the only outcome.
- Total number of observations considered in the model was 3,182.
- The odds ratios in this table are all weighted and adjusted to all included variables
- All the values in the table are rounded to two decimal places, except for the p-values.

# BMJ Open

## Prevalence and determinants of cigarette smoking relapse among US adult smokers - a longitudinal study

|                                 |                                                                                                                                                                                                                                                                                                                                |
|---------------------------------|--------------------------------------------------------------------------------------------------------------------------------------------------------------------------------------------------------------------------------------------------------------------------------------------------------------------------------|
| Journal:                        | <i>BMJ Open</i>                                                                                                                                                                                                                                                                                                                |
| Manuscript ID                   | bmjopen-2019-031676.R1                                                                                                                                                                                                                                                                                                         |
| Article Type:                   | Original research                                                                                                                                                                                                                                                                                                              |
| Date Submitted by the Author:   | 17-Oct-2019                                                                                                                                                                                                                                                                                                                    |
| Complete List of Authors:       | Alboksmaty, Ahmed; Imperial College London, School of Public Health<br>Agaku, Israel Terungwa; Harvard Univ<br>Odani, Satomi; National Center for Chronic Disease Prevention and Health Promotion, CDC<br>Filippidis, Filippos; Imperial College London, Department of Primary Care and Public Health, School of Public Health |
| <b>Primary Subject Heading</b>: | Smoking and tobacco                                                                                                                                                                                                                                                                                                            |
| Secondary Subject Heading:      | Epidemiology, Global health, Health policy, Public health                                                                                                                                                                                                                                                                      |
| Keywords:                       | PUBLIC HEALTH, Smoking, Prevention and control                                                                                                                                                                                                                                                                                 |
|                                 |                                                                                                                                                                                                                                                                                                                                |

SCHOLARONE™  
Manuscripts



1  
2  
3  
4  
5 **Prevalence and determinants of cigarette smoking relapse among US adult smokers -**  
6 **a longitudinal study**  
7  
8

9  
10 Ahmed M. Alboksmaty, MPH<sup>1</sup>, Israel T. Agaku, PhD<sup>2</sup>, Satomi Odani, MPH<sup>2</sup>, Filippos T.  
11 Filippidis, PhD<sup>1</sup>  
12

13  
14  
15 1: Department of Primary Care and Public Health, School of Public Health, Imperial College  
16 London, United Kingdom

17 2: Office of Smoking and Health, National Centre for Chronic Disease Prevention and Health  
18 Promotion, Centres for Disease Control and Prevention, Atlanta, Georgia  
19  
20

21  
22 **Corresponding author:**

|                |                                                                                                                                            |
|----------------|--------------------------------------------------------------------------------------------------------------------------------------------|
| <b>Name</b>    | <b>Ahmed Alboksmaty</b>                                                                                                                    |
| <b>Address</b> | School of Public Health, Imperial College London, Reynolds Building, St.<br>Dunstan's Road, London W6 8RP, United Kingdom                  |
| <b>Tel</b>     | +20 115 421 5691                                                                                                                           |
| <b>Email</b>   | <a href="mailto:alboksmatya@who.int">alboksmatya@who.int</a><br><a href="mailto:ahmed.m.naguib91@gmail.com">ahmed.m.naguib91@gmail.com</a> |

23  
24  
25  
26  
27  
28  
29  
30  
31  
32  
33  
34  
35  
36  
37  
38  
39  
40  
41  
42  
43  
44  
45  
46  
47  
48  
49  
50  
51  
52  
53  
54  
55  
56  
57  
58  
59  
60

## ABSTRACT

**Objectives:** This research project aims at estimating the prevalence of cigarette smoking relapse and determining its predictors among adult former smokers in the United States (US).

**Setting:** This research analysed secondary data retrieved from the Tobacco Use Supplement-Current Population Survey (TUS-CPS) 2010-11 cohort in the US.

**Participants:** Out of 18,499 participants who responded to the survey in 2010 and 2011, the analysis included a total sample size of 3,258 ever smokers, who were living in the US and reported quitting smoking in 2010. The survey's respondents who never smoked or reported current smoking in 2010 were excluded from the study sample.

**Primary and secondary outcome measures:** Smoking relapse was defined as picking up smoking in 2011 after reporting smoking abstinence in 2010. The prevalence of relapse over the 12-month follow-up period was estimated among different subgroups. Multivariable logistic regression models were applied to determine factors associated with relapse.

**Results:** A total of 184 former smokers reported smoking relapse by 2011 (weighted prevalence: 6.8%; 95% Confidence Interval [CI]: 5.7%-8.1%). Prevalence and odds of relapse were higher among young people compared to elders. Former smokers living in smoke-free homes had 60% lower odds of relapse compared to those living in homes that allowed smoking inside (aOR: 0.40; 95%CI: 0.25-0.64). Regarding race/ethnicity, only Hispanics showed significantly higher odds of relapse compared to Whites (non-Hispanics). Odds of relapse were higher among never married, widowed, divorced and separated individuals, compared to the married group. Continuous smoking cessation for 6 months or more significantly decreased odds of relapse.

**Conclusions:** Wider health determinants, such as race and age, but also living in smoke-free homes showed significant associations with smoking relapse, which could inform the

1  
2  
3 development of more targeted programmes to support those smokers who successfully quit,  
4  
5 although further longitudinal studies are required to confirm our findings.  
6

## 7 **ARTICLE SUMMARY**

### 10 **Strengths and limitations of this study**

- 13 • The data was retrieved from a longitudinal study, which is suitable for studying smoking  
14 relapse as a behaviour that develops over time after cessation.
- 17 • We used data from the most recent longitudinal survey of the TUS-CPS (2010-11)  
18 which is relatively old.
- 21 • Results should be interpreted with caution due to the relatively small sample size in  
22 some subgroups.
- 25 • Some factors found to be associated with relapse in earlier studies were not available in  
26 the dataset to be included in the regression models.
- 29 • Due to the inconsistent definitions of smoking relapse in the literature, sensitivity  
30 analyses were conducted using different cut-off points for the duration of smoking  
31 cessation.  
32  
33  
34  
35  
36  
37  
38  
39  
40  
41  
42  
43  
44  
45  
46  
47  
48  
49  
50  
51  
52  
53  
54  
55  
56  
57  
58  
59  
60

## LIST OF ABBREVIATIONS

|         |                                                  |
|---------|--------------------------------------------------|
| AIC     | Akaike information criterion                     |
| aOR     | Adjusted Odds Ratio                              |
| BIC     | Bayesian information criterion                   |
| CDC     | Centres of Disease Control and Prevention        |
| CHD     | Coronary Heart Disease                           |
| CI      | Confidence Interval                              |
| COPD    | Chronic Obstructive Pulmonary Diseases           |
| CPS     | Current Population Survey                        |
| CVD     | Cardiovascular Diseases                          |
| D.C     | District of Columbia                             |
| FCTC    | WHO Framework Convention on Tobacco Control      |
| GDP     | Gross Domestic Product                           |
| HP2020  | Healthy People 2020                              |
| N       | Number of observations                           |
| NCTP    | Non-Cigarette Tobacco Products                   |
| OR      | Unadjusted Odds Ratio                            |
| RR      | Relative Risk                                    |
| SFH     | Smoke Free Home                                  |
| TUS     | Tobacco Use Supplement                           |
| TUS-CPS | Tobacco Use Supplement-Current Population Survey |
| UK      | United Kingdom                                   |
| US      | United States of America                         |
| WHO     | World Health Organisation                        |

## INTRODUCTION

The World Health Organisation (WHO) estimates that there are 1.1 billion current smokers worldwide (1). According to the Centres for Disease Control and Prevention (CDC), 37.8 million adults were active smokers in the United States (US) in 2016, representing more than 15.5% of the total US population (2). Annually, smoking leads to 480,000 deaths in the US (3), and its related hazards cost approximately 1% of the country's Gross Domestic Product (GDP) (4, 5).

The prevalence of smoking is determined by the proportion of the non-smoking population that initiates smoking, and the proportion of smokers who die or quit. Most tobacco control programs aim to reduce smoking prevalence by preventing smoking initiation and promoting cessation; however, long-term cessation remains challenging. Although research on smoking cessation is abundant, most studies have explored factors associated with quit intentions and overall determinants of smoking abstinence (6-8), with only a few focusing on "relapsing"; i.e. restarting smoking after a temporarily successful cessation attempt.

Despite variations in the definitions used in the literature, smoking relapse essentially means picking up smoking after a period of abstinence (9). In past research, relapse rates within the first year of abstinence ranged from 60% to 90%, while two years of continuous cessation indicated a likelihood of 80% to maintain long-term abstinence (10). In this study, we use cigarette smoking to define relapse, as it is the most common method of tobacco use in the US and globally (>90%) (9). Thus, "smoking" refers to "cigarette smoking".

Although relapse has rarely been the specific focus of smoking cessation research, it is reasonable to assume that at least some of the factors found to be associated with smoking cessation overall also play a role in the process of relapse. Previous studies have reported a link between genetic factors and smoking behaviours (11). Other personal characteristics have been highlighted in relevant studies, including age (12), sex (13), race/ethnicity (14), and nicotine dependence (15). Researchers have previously shown that knowledge and

1  
2  
3 perceptions of smoking hazards influence individual intentions and motivations to quit or  
4 relapse (16, 17). Recent studies indicated the influence of community factors and support  
5 given to smokers on their determination and willingness to quit (18, 19). There is also evidence  
6 with regard to the impact of living in a Smoke-Free Home (SFH) (20), using Non-Cigarette  
7 Tobacco Products (NCTP) (21-23) and seeking specialist advice for quitting on smoking  
8 behaviours (24). Additionally, research showed that smokers newly diagnosed with chronic  
9 diseases, such as obstructive lung diseases, were more likely to quit smoking (25, 26).

10  
11 Nevertheless, there is a scarcity of studies assessing determinants of smoking relapse in  
12 particular, which remains an under-researched area. To fill this gap, this study aimed to  
13 measure the prevalence of cigarette smoking relapse among adult former smokers in the US  
14 and to determine predictors of relapse using a nationally representative longitudinal sample.  
15  
16  
17  
18  
19  
20  
21  
22  
23  
24  
25  
26  
27  
28  
29  
30  
31  
32  
33  
34  
35  
36  
37  
38  
39  
40  
41  
42  
43  
44  
45  
46  
47  
48  
49  
50  
51  
52  
53  
54  
55  
56  
57  
58  
59  
60

## METHODS

### Data Source

We conducted a secondary analysis of longitudinal data retrieved from the Tobacco Use Supplement-Current Population Survey (TUS-CPS). This survey has been conducted every 3 to 4 years in the US since 1992. It collects a broad range of data about the US population with topics varying from year to year. For this study, we used a longitudinal sample of the survey; the cohort baseline data was collected in May 2010 and the follow-up survey was conducted in May 2011. It focused on the population's smoking behaviours and cessation attitudes. No other data was recorded between these two time points (27, 28).

Selection of TUS-CPS respondents is designed to yield representative estimates for the US overall, as well as the 50 states and Washington, D.C. (29, 30). Since 2006, the survey has targeted US adults aged 18 years and above (28, 29). The cohort of 2010-11 was the most recent longitudinal sample of the survey that assessed the outcome of interest, smoking relapse. Data was collected by telephone or in-person interviews (29). In this particular cohort, 64% of participants completed the survey through telephone interviews and 36% through in-person interviews (27, 29). Approximately 20% of the data was recorded by proxy, while the rest was self-reported (29). For this research project, we only used data collected from self-respondents.

The analysis sample comprised individuals who reported being former smokers at baseline (May 2010 survey wave). Their smoking status was self-reported again after one year (May 2011). Relapse was defined as a failure to maintain smoking cessation between the two time points of data collection in the TUS-CPS surveys. Those who didn't report their smoking status in either wave or provided inconsistent data regarding having ever smoked between the two waves were excluded from the analysis. After applying the inclusion and exclusion criteria, the final study sample was 3,258, as illustrated in Figure 1.

## Measures

Cigarette smoking relapse status is the principle outcome of this study. Participants were asked to report their smoking status in 2010 and 2011; “*Do you now smoke cigarettes every day, some days, or not at all?*” Responses were categorized into a dichotomous variable (yes [every day or some days], and no [not at all]). Those who responded “not at all” in 2010, but “every day” or “some days” in 2011 were considered to have relapsed. Daily and non-daily smokers were grouped together as it has been shown that even very low cigarette consumption is associated with significant health risks (31).

Sociodemographic variables included age (18-24, 25-39, 40-65 and  $\geq 65$  years); sex (male, female); race/ethnicity (Hispanics, White non-Hispanics, Black non-Hispanics, and other non-Hispanics); education level, determined by the highest accomplished level (<high school, high school, some college, defined as partially completed college education, and college or higher); and finally, socioeconomic status, reflected by annual family income (US\$ <20k, 20-49k, 50-99k and  $\geq 100$ k). Categorising these variables was based on previously published reports and studies using the TUS-CPS surveys (32).

This study used six months of continuous smoking abstinence as a cut-off point for defining sustained cessation (i.e., former smokers), guided by previous relevant studies (33). The participants were asked in 2010 to answer: “*About how long has it been since you completely quit smoking cigarettes?*”(34). Answers equal to or higher than 26 weeks or 180 days were counted as six months or longer. Participants who responded “don’t know” or refused to answer were excluded from the analysis (n=28).

In 2010, the participants were asked “*Which statement best describes the rules about smoking inside your home? No one is allowed to smoke anywhere inside your home; smoking is allowed in some places or sometimes inside your home; or smoking is permitted anywhere inside your home*” (34). Those who stated that no one is allowed to smoke anywhere inside their home were classified as living in a SFH. All other respondents were classified as living in a non-SFH.



1  
2  
3 Use of four NCTPs were investigated in this study as factors potentially associated with  
4 cigarette smoking relapse: cigar, regular pipes, water pipes and smokeless tobacco.  
5 Participants were asked: *“Have you ever used any of the following even one time? (The four*  
6 *investigated NCTP were mentioned in separate questions)”*. A composite variable was created  
7 considering the use of any NCTP. Those who reported ever use of any of those products were  
8 classified as “ever users”. Those “ever users” were also asked: *“Do you NOW use a “NCTP”*  
9 *every day, some days or not at all?”*. The answers used to classify them into current and  
10 former users (34).  
11  
12  
13  
14  
15  
16  
17  
18  
19  
20  
21  
22

### 23 **Statistical analysis**

24  
25 Prevalence of smoking relapse was estimated among the whole cohort and within each  
26 subgroup. Logistic regression models were fitted to investigate unadjusted and adjusted  
27 associations between smoking relapse and a set of factors. The dependent variable of all  
28 logistic regression models was smoking relapse status. Factors identified as potentially  
29 relevant in existing literature were considered for inclusion in the models. The final  
30 specification of the models was decided based on an iterative approach using the Akaike  
31 Information Criterion (AIC) and the Bayesian Information Criterion (BIC). The significance level  
32 was set at 0.05. The official weights provided in the original datasets were used to account for  
33 the complexity of the TUS-CPS design. The analysis was performed using STATA 13.1.  
34 Missing observations and those with inconsistent ever smoking status in the follow-up survey  
35 were excluded from the analysis.  
36  
37  
38  
39  
40  
41  
42  
43  
44  
45  
46  
47  
48

49 Due to the varied definitions of smoking relapse in the literature, sensitivity analyses were  
50 conducted using different cut-off points for the duration of smoking cessation. Binary variables  
51 using one and three months as cut-off points were included into two separate models.  
52 Additionally, a separate model was fitted using four distinct periods of smoking cessation: less  
53 than 1 month, 1-3 months, 3-6 months, and 6 months or more. Reporting 30-days of  
54  
55  
56  
57  
58  
59  
60

1  
2  
3 abstinence was counted as one month; 13-weeks, or 90-days were counted as 3-months; and  
4  
5 26-weeks or 180-days was considered as 6-months.  
6  
7  
8  
9

### 10 **Patient and Public Involvement**

11  
12 It was not applicable to directly involve the public in this research project as it was a  
13  
14 secondary data analysis. Ethics approval and consents were deemed unnecessary for this  
15  
16 study under national regulations.  
17  
18  
19  
20  
21  
22  
23  
24  
25  
26  
27  
28  
29  
30  
31  
32  
33  
34  
35  
36  
37  
38  
39  
40  
41  
42  
43  
44  
45  
46  
47  
48  
49  
50  
51  
52  
53  
54  
55  
56  
57  
58  
59  
60

For peer review only

## RESULTS

After applying the inclusion and exclusion criteria only 3,258 of the 18,499 participants who answered both TUS-CPS surveys in 2010 and 2011 were included in the final analysis. We excluded 55 participants from the analysis due to missing observations.

Table 1 illustrates the sociodemographic characteristics of the final study population based on their self-reported answers in the baseline survey. Prevalence estimates were 2.6%, 0.7%, 0.04%, and 2.5% for ever-use of cigars, regular pipes, water pipes, and smokeless tobacco products, respectively. Former users of any NCTP accounted for 37.2% among all participants.

Figure 2 presents weighted prevalence of relapse among different subgroups. Out of 3,258 former smokers in 2010, a total of 184 reported smoking relapse by May 2011. They represented 6.8% (95% Confidence Interval [CI]: 5.7%-8.1%) of the cohort. The prevalence of smoking relapse was lower than 20% in all subgroups, except among people aged 18-24 years (34.4%; 95% CI: 18.4%-54.9%); and among those who reported smoking abstinence for less than 6 months prior to the baseline survey (40.8%; 95%CI: 30.8%-51.6%).

Table 2 presents the results of the unadjusted and the final adjusted multivariable logistic regression model exploring associations of smoking relapse with individual and environmental factors among the study population. Despite the limited number of Hispanic participants, they were more likely to relapse compared to White non-Hispanics (adjusted odds ratio [aOR]: 2.05; 95% CI: 1.03–4.08). The likelihood of relapse was also significantly associated with age. After adjusting for all the other variables, the youngest age group (18-24 years) still had the highest odds of relapse among all sub-groups (aOR compared to the oldest group: 15.75; 95% CI: 4.23–58.42). Sex showed no significant association with smoking relapse, although there is some suggestion that males were less likely to relapse.

Widowed and divorced former smokers had 2.77 (95% CI: 1.31-5.84) and 2.34 (95% CI: 1.41-3.85) times the odds of relapse compared to the married group, respectively. Separated

1  
2  
3 individuals had approximately four times the odds of relapse compared to married respondents  
4 (aOR: 4.16; 95% CI: 1.65-10.52). Living in a home where smoking inside was prohibited  
5  
6 reduced the odds of relapse by 60% compared to living in homes where smoking was allowed  
7  
8 (aOR: 0.40; 95% CI: 0.25-0.64).  
9  
10

11  
12 Additionally, the adjusted model showed that smoking cessation for 6 months or more was a  
13  
14 robust predictor of not relapsing, even after adjusting for the other variables. Those who  
15  
16 reported smoking abstinence for more than 6 months had 87% lower odds of relapse  
17  
18 compared to the group who had quit smoking for less than 6 months at the time of the 2010  
19  
20 survey (aOR: 0.13; 95% CI: 0.07-0.23).  
21  
22

23  
24 The sensitivity analyses using different cut-off points for the cessation period prior to the  
25  
26 baseline survey (Supplementary tables 1-3) consistently showed that longer periods of prior  
27  
28 abstinence were strongly associated with lower odds of relapse.  
29  
30  
31  
32  
33  
34  
35  
36  
37  
38  
39  
40  
41  
42  
43  
44  
45  
46  
47  
48  
49  
50  
51  
52  
53  
54  
55  
56  
57  
58  
59  
60

## DISCUSSION

Our analysis estimated the overall prevalence of smoking relapse among US former smokers between 2010 and 2011 at 6.8%, although this figure varied widely among population subgroups. Five factors had significant associations with relapse: duration of smoking cessation; living in SFHs; marital status; age; and race/ethnicity.

The estimated prevalence of relapse in this study was consistent with a previous meta-analysis reporting relapse after one year of smoking abstinence which reported this figure to be between 5-17% (35). A study comparing US and UK former smokers found that adults living in the US were more likely to relapse in less than 28 days of abstinence (36). Americans are slightly younger in age and more ethnically and racially diverse (37), which based on the findings of our study may explain some of these differences.

We found a significant association between duration of smoking cessation and relapse, which shows that the longer it's been since quitting, the easier it gets to remain quit. This highlights that quitters may require extra support during the critical early days after stopping. This association could be primarily explained by the addictive characteristics of nicotine, the effect of which are attenuated following a relatively short period of abstinence (38). Moreover, psychosocial, financial and cultural factors increase the risk of relapse particularly during the first 6 months of quitting (33). Another study found that three months of continuous abstinence is the critical period after which the likelihood of successful quitting increases, which is consistent with our main and sensitivity analyses (39). However, the cessation periods calculated in this study only refer to the time prior to the first data collection point. We did not have data on the length of the abstinence period between the baseline survey and the exact time of relapse; hence, the actual period of abstinence may differ from what we used in our analyses, although we have no reason to believe this may have introduced systematic error in our analysis.

1  
2  
3 Living in a SFH decreased the odds of relapse for former smokers by 60%. Previous studies  
4 have reported a 40% reduction in odds of relapse among similar groups (20). A previous  
5 cohort study showed that members of households banning smoking had 12% higher likelihood  
6 to successfully quit smoking (20). The impact of SFH on smoking behaviours is consistent  
7 among disadvantaged populations, such as low-income smokers (40), highlighting the  
8 influence of the immediate social and physical environment on smoking behaviours. Along the  
9 same lines, having a partner who is a former or current smoker may affect quitting decisions  
10 of the spouse (41). Losing a partner may demotivate quitters from successfully maintaining  
11 smoking cessation (16, 17, 33). Additionally, being separated, divorced, or widowed might  
12 drive a general feeling of insecurity and anxiety (42, 43), which could explain the higher rates  
13 of relapse found among these subgroups in our analysis.  
14  
15

16 We also found that young adults were the most likely to relapse among all subgroups. Young  
17 adults have more opportunities to smoke in groups during parties, festivals and celebrations  
18 (44) and are more vulnerable to peer pressure which makes them more susceptible to smoking  
19 relapse after cessation (45). Younger smokers may also underestimate the health  
20 consequences of smoking, which may weaken their determination to quit (17). Older  
21 individuals in our sample were also more likely to have quit many years earlier, which, as  
22 highlighted before, is a robust predictor of sustained abstinence.  
23  
24

25 Hispanics had higher odds of relapse compared to non-Hispanic groups. Hispanics in the US  
26 are more likely to be affected by health inequalities due to health insurance challenges,  
27 economic burden and cultural sensitivity (46, 47). These disparities are manifested in and may  
28 be compounded by their lower success in quitting compared to Whites, which perpetuates  
29 social and health inequality in the US.  
30  
31

32 This study sheds light on smoking relapse and provides an insight into its predictors in a  
33 representative sample of the adult US population. Using a longitudinal design allowed us to  
34 explore smoking relapse over the course of twelve months. However, the tobacco products  
35  
36  
37  
38  
39  
40  
41  
42  
43  
44  
45  
46  
47  
48  
49  
50  
51  
52  
53  
54  
55  
56  
57  
58  
59  
60

1  
2  
3 environment has changed considerably since 2011; therefore, our findings may not fully reflect  
4 the current conditions in the US.  
5  
6

7  
8 The questions of TUS-CPS were not originally designed to study smoking relapse as an  
9 outcome; for example, the exact time point of relapse was not reported which may have led to  
10 inaccurate estimates for some individuals; it is unclear whether any such inaccuracies may  
11 have followed a pattern that could influence the results. The scope of the study was also not  
12 broad enough to investigate some factors shown to have significant associations with smoking  
13 relapse in previous studies, such as genetic factors (11) and perceptions regarding smoking  
14 hazards (16, 17).  
15  
16  
17  
18  
19  
20  
21  
22

23 Relying only on self-reported data and the relatively high frequency of inconsistent reporting  
24 of ever smoker status between the two waves of the survey may have introduced selection  
25 bias which would have an impact on the representativeness of the study sample. Moreover,  
26 although the original sample size of TUS-CPS was large, our analytical sample was smaller;  
27 hence findings in certain subgroups, such as the Hispanics, should be interpreted with caution.  
28 Nonetheless, the overall sample was originally weighted in the main dataset to be  
29 representative of the national population.  
30  
31  
32  
33  
34  
35  
36  
37  
38

39 Our analysis contributes to the limited literature on the epidemiology of smoking relapse at the  
40 population level. Further studies could explore the magnitude of the problem among high risk  
41 groups and in other populations as well as more factors associated with relapse. Our findings  
42 can also inform tobacco control policies and specific interventions targeting those recent  
43 quitters who are at the highest risk of relapse, especially among vulnerable groups.  
44  
45  
46  
47  
48  
49  
50  
51  
52

### 53 **Conclusion**

54 Smoking prevalence is a function of multiple parameters, such as initiation, cessation and  
55 relapse. Of these parameters, smoking relapse has been the least investigated. The  
56 prevalence of relapse within a one-year period was estimated at 6.8% in this study. We found  
57  
58  
59  
60

1  
2  
3 that age, race/ethnicity, marital status, duration of smoking cessation and living in SFHs were  
4 associated with smoking relapse among adults in the US, highlighting the need for targeted  
5 interventions to reduce relapse and increase long-term success of quit attempts. Further  
6 research purposefully designed to monitor and investigate relapse should be directed to  
7 explore determinants of relapse among different populations, and at various points in time  
8 following cessation.  
9  
10  
11  
12  
13  
14  
15  
16  
17  
18  
19  
20  
21  
22  
23  
24  
25  
26  
27  
28  
29  
30  
31  
32  
33  
34  
35  
36  
37  
38  
39  
40  
41  
42  
43  
44  
45  
46  
47  
48  
49  
50  
51  
52  
53  
54  
55  
56  
57  
58  
59  
60

For peer review only



## FUNDING

This research received no specific grant from any funding agency in the public, commercial or not-for-profit sectors.

## DECLARATION OF INTERERERSTS

The authors report no conflict of interest.

## DATA AVAILABILITY STATEMENT

The data is publically available on the website of the Centers for Disease Control and Prevention (CDC), USA. It can be accessed and downloaded through the page of "Tobacco Use Supplement to the Current Population Survey (TUS-CPS) Data" on the website; <https://healthdata.gov/dataset/tobacco-use-supplement-current-population-survey-tus-cps-data>. No unpublished data were used in the study.

## AUTHORS' CONTRIBUTIONS

The first author, A.A, conducted the data analysis, reported results, and wrote the first draft of the study manuscript. The second and third authors, I.A and S.O, helped in cleaning the data and guided the analysis from their previous experience in analyzing data from the used survey.

The fourth author, F.F, proposed with the first author the research question and provided support for designing and coordinating the research project, in addition to contributing in writing the final manuscript of the study. All authors significantly contributed to the research project and agreed on its all aspects.

## REFERENCES

1. World Health Organization. Global Action on Patient Safety for Achieving Effective Universal Health Coverage. 71th World Health Assembly World Health Organization; 2018 22 May, 2018.
2. Wang TW, Asman K, Gentzke AS, Cullen KA, Holder-Hayes E, Reyes-Guzman C, et al. Tobacco Product Use Among Adults - United States, 2017. *MMWR Morb Mortal Wkly Rep.* 2018;67(44):1225-32.
3. Warren GW, Alberg AJ, Kraft AS, Cummings KM. The 2014 Surgeon General's report: "The health consequences of smoking--50 years of progress": a paradigm shift in cancer care. *Cancer.* 2014;120(13):1914-6.
4. Ekpu VU, Brown AK. The Economic Impact of Smoking and of Reducing Smoking Prevalence: Review of Evidence. *Tobacco Use Insights.* 2015;8:1-35.
5. Centers for Disease Control and Prevention. Smoking-Attributable Mortality, Years of Potential Life Lost, and Productivity Losses --- United States, 2000--2004: Centers for Disease Control and Prevention; November 14, 2008 [cited 2018 5th July]. Available from: <https://www.cdc.gov/mmwr/preview/mmwrhtml/mm5745a3.htm>.
6. Chezian C, Murthy S, Prasad S, Kasav JB, Mohan SK, Sharma S, et al. Exploring Factors that Influence Smoking Initiation and Cessation among Current Smokers. *Journal of clinical and diagnostic research : JCDR.* 2015;9(5):LC08-LC12.
7. Cantrell J, Bennett M, Mowery P, Xiao H, Rath J, Hair E, et al. Patterns in first and daily cigarette initiation among youth and young adults from 2002 to 2015. *PLoS one.* 2018;13(8):e0200827-e.
8. Reyes-Guzman CM, Pfeiffer RM, Lubin J, Freedman ND, Cleary SD, Levine PH, et al. Determinants of Light and Intermittent Smoking in the United States: Results from Three Pooled National Health Surveys. *Cancer epidemiology, biomarkers & prevention : a publication of the American Association for Cancer Research, cosponsored by the American Society of Preventive Oncology.* 2017;26(2):228-39.
9. Arizona Department of Health Services. Smoking Relapse: What to Do If You Start Smoking Again: ASH LiNE Website; 2017 [Available from: <https://ashline.org/es/smoking-relapse-what-to-do-if-you-start-smoking-again/>].
10. Krall EA, Garvey AJ, Garcia RI. Smoking relapse after 2 years of abstinence: findings from the VA Normative Aging Study. *Nicotine & Tobacco Research.* 2002;4(1):95-100.
11. Lerman CE, Schnoll RA, Munafo MR. Genetics and smoking cessation improving outcomes in smokers at risk. *Am J Prev Med.* 2007;33(6 Suppl):S398-405.
12. Babb S MA, Schauer G, Asman K, Jamal A,. Quitting Smoking Among Adults — United States, 2000–2015. Weekly report. Centers for Disease Control and Prevention: CDC; 2017 2017.
13. McKee Sherry A, Maciejewski Paul K, Falba T, Mazure Carolyn M. Sex differences in the effects of stressful life events on changes in smoking status. *Addiction.* 2003;98(6):847-55.
14. Sakuma K-LK, Felicitas-Perkins JQ, Blanco L, Fagan P, Pérez-Stable EJ, Pulvers K, et al. Tobacco use disparities by racial/ethnic groups: California compared to the United States. *Preventive medicine.* 2016;91:224-32.
15. Vangeli E, Stapleton J, Smit Eline S, Borland R, West R. Predictors of attempts to stop smoking and their success in adult general population samples: a systematic review. *Addiction.* 2011;106(12):2110-21.
16. Borland R, Yong H-H, Balmford J, Cooper J, Cummings KM, O'Connor RJ, et al. Motivational factors predict quit attempts but not maintenance of smoking cessation: Findings from the International Tobacco Control Four country project. *Nicotine & Tobacco Research.* 2010;12(suppl\_1):S4-S11.
17. El-Khoury Lesueur F, Bolze C, Melchior M. Factors associated with successful vs. unsuccessful smoking cessation: Data from a nationally representative study. *Addictive Behaviors.* 2018;80:110-5.

18. General ARotS. Social, Environmental, Cognitive, and Genetic Influences on the Use of Tobacco Among Youth 2012 [Available from: <https://www.ncbi.nlm.nih.gov/books/NBK99236/>].
19. Petraitis J, Flay BR, Miller TQ. Reviewing theories of adolescent substance use: Organizing pieces in the puzzle. *Psychological Bulletin*. 1995;117(1):67-86.
20. Hyland A, Higbee C, Travers MJ, Van Deusen A, Bansal-Travers M, King B, et al. Smoke-free homes and smoking cessation and relapse in a longitudinal population of adults. *Nicotine & Tobacco Research*. 2009;11(6):614-8.
21. Connor RJ. Non-cigarette tobacco products: what have we learnt and where are we headed? *Tobacco Control*. 2012;21(2):181.
22. Cornacchione Ross J, Noar SM, Sutfin EL. Systematic Review of Health Communication for Non-Cigarette Tobacco Products. *Health Communication*. 2017:1-9.
23. Zhuang Y-L, Cummins SE, Y Sun J, Zhu S-H. Long-term e-cigarette use and smoking cessation: a longitudinal study with US population. *Tobacco Control*. 2016;25(Suppl 1):i90.
24. Song F, Maskrey V, Blyth A, Brown TJ, Barton GR, Aveyard P, et al. Differences in Longer-Term Smoking Abstinence After Treatment by Specialist or Nonspecialist Advisors: Secondary Analysis of Data From a Relapse Prevention Trial. *Nicotine & Tobacco Research*. 2016;18(5):1061-6.
25. Danielsen SE, Lochen ML, Medbo A, Vold ML, Melbye H. A new diagnosis of asthma or COPD is linked to smoking cessation - the Tromso study. *Int J Chron Obstruct Pulmon Dis*. 2016;11:1453-8.
26. Patel K, Schlundt D, Larson C, Wang H, Brown A, Hargreaves M. Chronic illness and smoking cessation. *Nicotine Tob Res*. 2009;11(8):933-9.
27. National Cancer Institute DoCCPS. What is the TUS-CPS? 2018 [Available from: <https://cancercontrol.cancer.gov/brp/tcrb/tus-cps/>].
28. National Cancer Institute U. Tobacco Use Supplement: NIH; January 2018 [Available from: [https://cancercontrol.cancer.gov/brp/tcrb/tus-cps/TUS-CPS\\_fact\\_sheet.pdf?file=/studies/tus-cps/TUS-CPS\\_fact\\_sheet.pdf](https://cancercontrol.cancer.gov/brp/tcrb/tus-cps/TUS-CPS_fact_sheet.pdf?file=/studies/tus-cps/TUS-CPS_fact_sheet.pdf)].
29. Office of Disease Prevention and Health Promotion. Tobacco Use Supplement-Current Population Survey ODPHP website: Office of Disease Prevention and Health Promotion,; 2012 [cited 2018 July 28]. Available from: <https://www.healthypeople.gov/2020/data-source/tobacco-use-supplement-current-population-survey>.
30. Wang Y, Sung HY, Yao T, Lightwood J, Max W. Factors associated with short-term transitions of non-daily smokers: socio-demographic characteristics and other tobacco product use. *Addiction*. 2017;112(5):864-72.
31. Hackshaw A, Morris JK, Boniface S, Tang JL, Milenkovic D. Low cigarette consumption and risk of coronary heart disease and stroke: meta-analysis of 141 cohort studies in 55 study reports. *BMJ*. 2018;360:j5855.
32. National Cancer Institute-Division of Cancer Control & Population Sciences. Reports & Publications Using the TUS-CPS 2018 [cited 2018 16 July]. Available from: <https://cancercontrol.cancer.gov/brp/tcrb/tus-cps/publications.html>.
33. Yong H-H, Borland R, Cummings KM, Partos T. Do predictors of smoking relapse change as a function of duration of abstinence? Findings from the United States, Canada, United Kingdom and Australia. *Addiction*. 2018;113(7):1295-304.
34. National Cancer Institute - Tobacco Control Research Branch. 2010-2011 Tobacco Use Supplement to the Current Population Survey 2013 [cited 2018 12 July]. Available from: [https://cancercontrol.cancer.gov/brp/tcrb/tus-cps/surveys/tuscps\\_english\\_2010.pdf](https://cancercontrol.cancer.gov/brp/tcrb/tus-cps/surveys/tuscps_english_2010.pdf).
35. Hughes JR, Peters EN, Naud S. Relapse to smoking after 1 year of abstinence: a meta-analysis. *Addict Behav*. 2008;33(12):1516-20.
36. Gibson JE, Murray RL, Borland R, Cummings KM, Fong GT, Hammond D, et al. The impact of the United Kingdom's national smoking cessation strategy on quit attempts and use of cessation services: Findings from the International Tobacco Control Four Country Survey. *Nicotine & Tobacco Research*. 2010;12:S64-S71.

- 1  
2  
3 37. Tunstall RK. Americans and Britons: Key Population Data from the Last Three U.S. and U.K.  
4 Censuses. Brookings Website: Brookings Inc; 2005.
- 5 38. Georgiadou C, Lavdaniti M, Psychogiou M, Tzenalis A, Sgantzios M, Sapountzi-Krepia D.  
6 Factors Affecting the Decision to Quit Smoking of the Participants of a Hospital-Based Smoking  
7 Cessation Program in Greece. *Journal of Caring Sciences*. 2015;4(1):1-11.
- 8 39. Burke MV, Hays JT, Ebbert JO. Varenicline for smoking cessation: a narrative review of  
9 efficacy, adverse effects, use in at-risk populations, and adherence. *Patient Prefer Adher*.  
10 2016;10:435-41.
- 11 40. Vijayaraghavan M, Messer K, White MM, Pierce JP. The effectiveness of cigarette price and  
12 smoke-free homes on low-income smokers in the United States. *Am J Public Health*.  
13 2013;103(12):2276-83.
- 14 41. Takagi D, Kondo N, Takada M, Hashimoto H. Differences in spousal influence on smoking  
15 cessation by gender and education among Japanese couples. *BMC Public Health*. 2014;14:1184.
- 16 42. Rodriguez LM, DiBello AM, Overup CS, Neighbors C. The Price of Distrust: Trust, Anxious  
17 Attachment, Jealousy, and Partner Abuse. *Partner Abuse*. 2015;6(3):298-319.
- 18 43. Institute of Medicine (US) Committee for the Study of Health Consequences of the Stress of  
19 Bereavement. Reactions to Particular Types of Bereavement. In: Osterweis M, Solomon F, Green M,  
20 editors. *Bereavement: Reactions, Consequences, and Care*. Washington (DC)1984.
- 21 44. National Center for Chronic Disease Prevention and Health Promotion (US) Office on  
22 Smoking and Health. Social, Environmental, Cognitive, and Genetic Influences on the Use of Tobacco  
23 Among Youth 2012 [Available from: <https://www.ncbi.nlm.nih.gov/books/NBK99236/>].
- 24 45. Collins SE, Witkiewitz K, Kirouac M, Marlatt GA. Preventing Relapse Following Smoking  
25 Cessation. *Current cardiovascular risk reports*. 2010;4(6):421-8.
- 26 46. Vega WA, Rodriguez MA, Gruskin E. Health disparities in the Latino population. *Epidemiol*  
27 *Rev*. 2009;31:99-112.
- 28 47. Velasco-Mondragon E, Jimenez A, Palladino-Davis AG, Davis D, Escamilla-Cejudo JA. Hispanic  
29 health in the USA: a scoping review of the literature. *Public Health Rev*. 2016;37:31.
- 30  
31  
32  
33  
34  
35  
36  
37  
38  
39  
40  
41  
42  
43  
44  
45  
46  
47  
48  
49  
50  
51  
52  
53  
54  
55  
56  
57  
58  
59  
60

**Table 1:** Descriptive statistics of the baseline former smokers' cohort, based on the self-reported answers in the TUS-CPS 2010 survey, in the US. (N=3,258)

|                                                  | N <sup>1</sup> | Weighted % <sup>2</sup> |
|--------------------------------------------------|----------------|-------------------------|
| <b>Sex</b>                                       |                |                         |
| Male                                             | 1639           | 57.3%                   |
| Female                                           | 1619           | 42.7%                   |
| <b>Age group (years)</b>                         |                |                         |
| 65+                                              | 1078           | 31.5%                   |
| 40-64                                            | 1672           | 48.3%                   |
| 25-39                                            | 472            | 17.3%                   |
| 18-24                                            | 36             | 2.9%                    |
| <b>Race/Ethnicity</b>                            |                |                         |
| White (non-Hispanics)                            | 2859           | 83.9%                   |
| Black (non-Hispanics)                            | 172            | 6.0%                    |
| Other (non-Hispanics)                            | 101            | 3.6%                    |
| Hispanics                                        | 126            | 6.6%                    |
| <b>Annual family income (USD)</b>                |                |                         |
| <20k                                             | 494            | 15.6%                   |
| 20-49K                                           | 1110           | 34.8%                   |
| 50-99K                                           | 1073           | 32.4%                   |
| 100k+                                            | 581            | 17.3%                   |
| <b>Education level</b>                           |                |                         |
| <High school                                     | 356            | 11.8%                   |
| High school                                      | 977            | 29.4%                   |
| Some college <sup>3</sup>                        | 1574           | 48.1%                   |
| College+ <sup>4</sup>                            | 351            | 10.8%                   |
| <b>Marital status</b>                            |                |                         |
| Married                                          | 1872           | 57.7%                   |
| Widowed                                          | 402            | 11.3%                   |
| Divorced                                         | 576            | 16.3%                   |
| Separated                                        | 48             | 1.9%                    |
| Never married                                    | 360            | 12.7%                   |
| <b>Non-Cigarette Tobacco Products (NCTP) use</b> |                |                         |
| Never use                                        | 1920           | 57.2%                   |
| Current user                                     | 159            | 5.6%                    |
| Former user                                      | 1144           | 37.2%                   |
| <b>Smoking cessation period</b>                  |                |                         |
| < 6 Months                                       | 127            | 4.8%                    |
| ≥ 6 Months                                       | 3103           | 95.2%                   |
| <b>Living in smoke-free home (SFH)</b>           |                |                         |
| Non-SFH                                          | 463            | 14.6%                   |
| SFH                                              | 2738           | 85.4%                   |
| <b>Smoke-free workplace</b>                      |                |                         |
| Indoor smoking-allowed                           | 175            | 6.3%                    |
| Indoor smoke-free                                | 950            | 31.9%                   |
| Outdoor                                          | 125            | 4.7%                    |

|              |             |             |
|--------------|-------------|-------------|
| Undetermined | 208         | 6.6%        |
| Not-employed | 1530        | 50.5%       |
| <b>Total</b> | <b>3258</b> | <b>100%</b> |

*1: Number of participants. 2: Using official weights to ensure the sample is representative of the source population 3: Partially completed college education. 4: Completed a college education or higher.*

*- Counts and percentages in this table include only completed answers in each variable, excluding missing observations; 28 were missed in smoking cessation period, 57 in SFH, and 270 in smoke-free workplace.*

For peer review only

**Table 2:** Predictors of smoking relapse among the US adult former smokers, data extracted from the TUS-CPS 2010-11 cohort surveys (N=3182).

| Independent Variables                    | Unadjusted OR <sup>2</sup><br>(Lower and Upper<br>Limits of 95% CI) | Adjusted OR <sup>2</sup><br>(Lower and Upper<br>Limits of 95% CI) |
|------------------------------------------|---------------------------------------------------------------------|-------------------------------------------------------------------|
| <b>Age group (years)</b>                 |                                                                     |                                                                   |
| 65+ (ref) <sup>3</sup>                   | 1                                                                   | 1                                                                 |
| 40-64                                    | 3.95 (2.23-6.99)                                                    | 4.28 (2.19-8.37)                                                  |
| 25-39                                    | 7.56 (4.05-14.10)                                                   | 8.09 (3.72-17.62)                                                 |
| 18-24                                    | 29.40 (10.89-79.37)                                                 | 15.75 (4.25-58.42)                                                |
| <b>Sex</b>                               |                                                                     |                                                                   |
| Female (ref) <sup>3</sup>                | 1                                                                   | 1                                                                 |
| Male                                     | 0.89 (0.62-1.28)                                                    | 0.91 (0.61-1.37)                                                  |
| <b>Smoking cessation Period</b>          |                                                                     |                                                                   |
| < 6 Months (ref) <sup>3</sup>            | 1                                                                   | 1                                                                 |
| ≥ 6 Months                               | 0.08 (0.05-0.12)                                                    | 0.13 (0.07-0.23)                                                  |
| <b>Living in SFH<sup>4</sup></b>         |                                                                     |                                                                   |
| Non-SFH (ref) <sup>3</sup>               | 1                                                                   | 1                                                                 |
| SFH                                      | 0.37 (0.25-0.58)                                                    | 0.40 (0.25-0.64)                                                  |
| <b>Marital status</b>                    |                                                                     |                                                                   |
| Married (ref) <sup>3</sup>               | 1                                                                   | 1                                                                 |
| Widowed                                  | 1.03 (0.58-1.86)                                                    | 2.77 (1.31-5.84)                                                  |
| Divorced                                 | 1.86 (1.18-2.92)                                                    | 2.34 (1.42-3.85)                                                  |
| Separated                                | 4.67 (1.96-11.18)                                                   | 4.16 (1.65-10.52)                                                 |
| Never married                            | 3.42 (2.03-5.79)                                                    | 1.48 (0.82-2.67)                                                  |
| <b>Race/Ethnicity</b>                    |                                                                     |                                                                   |
| White (non-Hispanics) (ref) <sup>3</sup> | 1                                                                   | 1                                                                 |
| Black (non-Hispanics)                    | 1.72 (0.88-3.36)                                                    | 0.94 (0.44-2.02)                                                  |
| Other (non-Hispanics)                    | 0.94 (0.38-2.36)                                                    | 0.81 (0.30-2.19)                                                  |
| Hispanics                                | 2.45 (1.31-4.57)                                                    | 2.05 (1.03-4.08)                                                  |

<sup>1</sup>: Confidence interval. <sup>2</sup>: Odds ratio. <sup>3</sup>: Reference group. <sup>4</sup>: Smoke-Free Home.

- Smoking relapse is the only outcome.

- The odds ratios in this table are all weighted.

- Adjusted odds ratio are adjusted for all variables in the table.

- AIC Value: 1134.57; BIC Value: 1219.49



1  
2  
3  
4  
5  
6  
7  
8  
9  
10  
11  
12  
13  
14  
15  
16  
17  
18  
19  
20  
21  
22  
23  
24  
25  
26  
27  
28  
29  
30  
31  
32  
33  
34  
35  
36  
37  
38  
39  
40  
41  
42  
43  
44  
45  
46  
47  
48  
49  
50  
51  
52  
53  
54  
55  
56  
57  
58  
59  
60

**Figure 1: flow chart illustrates the steps of selecting the study sample based on the inclusion and exclusion criteria**

For peer review only

1  
2  
3 **Figure 2. Weighted prevalence of smoking relapse former smokers in the TUS\_CPS**  
4 **2010-11 cohort surveys in the US (N=3258)**  
5  
6  
7  
8  
9

10 ***Some college: Partially completed college education. College+: Completed a college***  
11 ***education or higher. CI: Confidence Interval. OVERALL: Overall prevalence of relapse***  
12 ***among all participants. NCTP: Non-cigarette tobacco products. Weighted prevalence***  
13 ***has incorporated official weights to ensure the sample is representative of the source***  
14 ***population.***  
15  
16  
17  
18  
19  
20  
21  
22  
23  
24  
25  
26  
27  
28  
29  
30  
31  
32  
33  
34  
35  
36  
37  
38  
39  
40  
41  
42  
43  
44  
45  
46  
47  
48  
49  
50  
51  
52  
53  
54  
55  
56  
57  
58  
59  
60

For peer review only

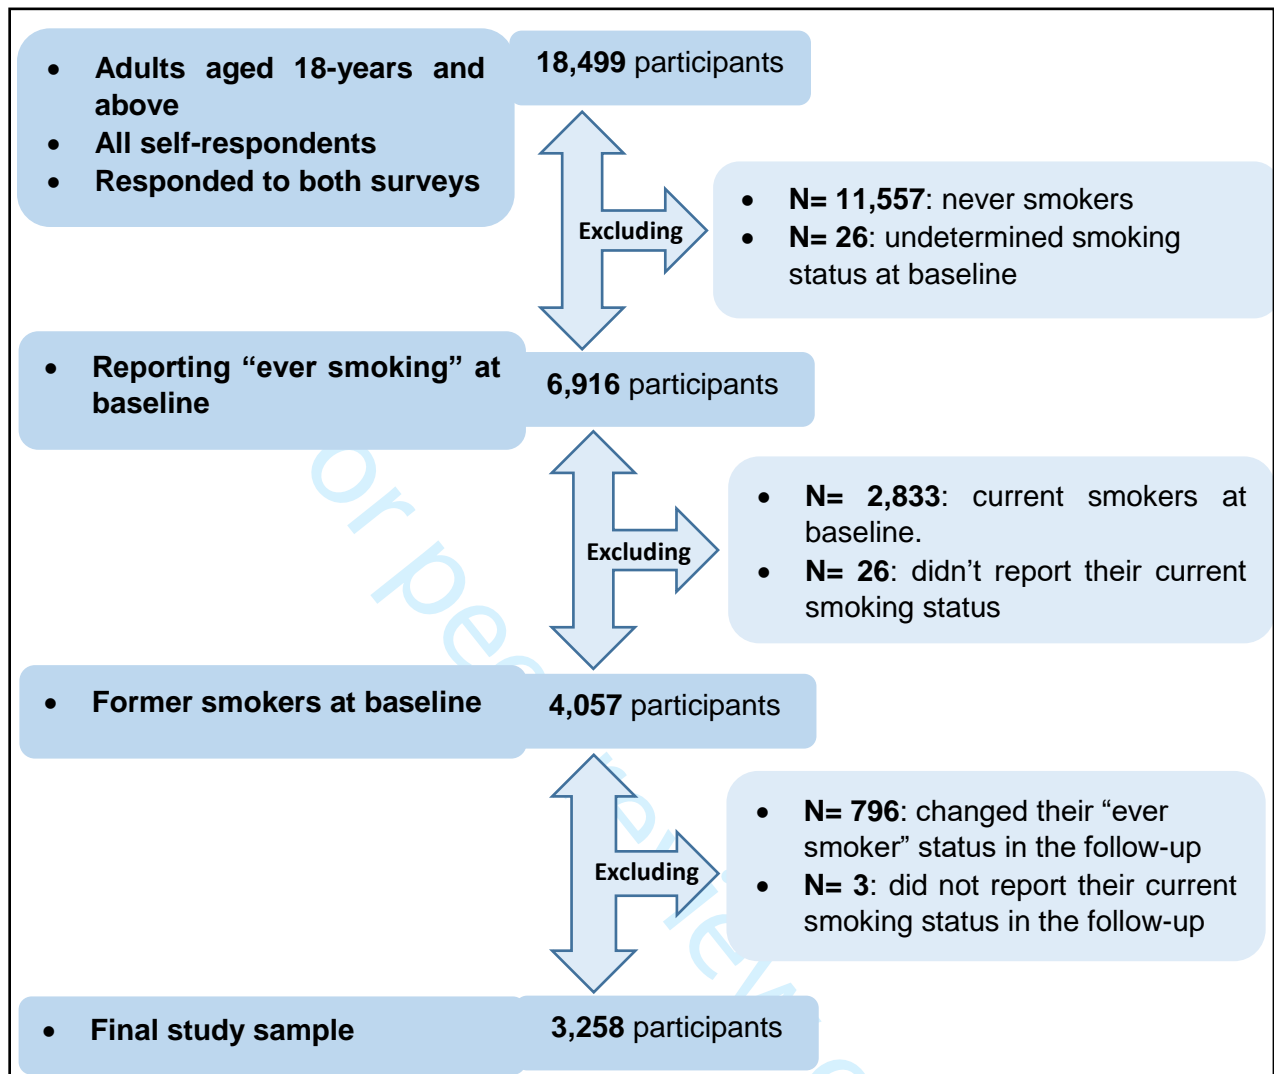

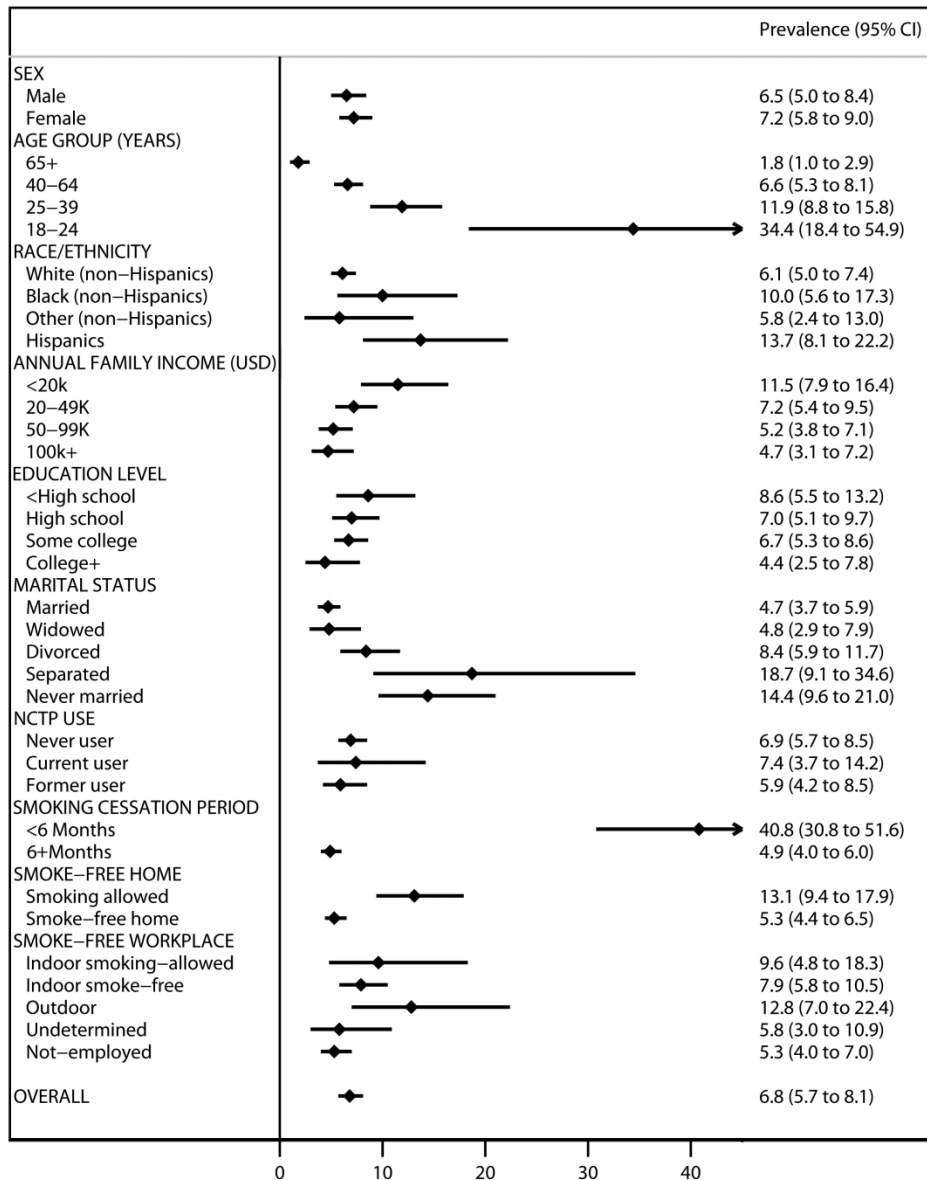

Figure 2. Weighted prevalence of smoking relapse former smokers in the TUS\_CPS 2010-11 cohort surveys in the US (N=3258)

Some college: Partially completed college education. College+: Completed a college education or higher. CI: Confidence Interval. OVERALL: Overall prevalence of relapse among all participants. NCTP: Non-cigarette tobacco products. Weighted prevalence has incorporated official weights to ensure the sample is representative of the source population.

229x286mm (300 x 300 DPI)

**Supplementary table-1:** Results of a multivariate logistic regression model for exploring predictors of smoking relapse among the US adult smokers using 1-month as a cut-off point for stratifying the smoking cessation period.

| Independent Variables                    | Adjusted OR <sup>1</sup> | Lower and upper limits of 95% CI <sup>2</sup> |             |
|------------------------------------------|--------------------------|-----------------------------------------------|-------------|
|                                          |                          | Lower                                         | Upper       |
| <b>Age group (years)</b>                 |                          |                                               |             |
| 65+ (ref) <sup>3</sup>                   | 1                        | -                                             | -           |
| 40-64                                    | 4.55                     | 2.39                                          | 8.68        |
| 25-39                                    | 9.32                     | 4.47                                          | 19.43       |
| 18-24                                    | 22.82                    | 7.45                                          | 69.90       |
| <b>Sex/Gender</b>                        |                          |                                               |             |
| Female (ref) <sup>3</sup>                | 1                        | -                                             | -           |
| Male                                     | 0.89                     | 0.60                                          | 1.31        |
| <b>Smoking cessation Period*</b>         |                          |                                               |             |
| < 1 Month (ref) <sup>3</sup>             | 1                        | -                                             | -           |
| ≥ 1 Month                                | <b>0.08</b>              | <b>0.03</b>                                   | <b>0.17</b> |
| <b>Living in SFH<sup>4</sup></b>         |                          |                                               |             |
| Non-SFH <sup>4</sup>                     | 1                        | -                                             | -           |
| SFH <sup>4</sup>                         | 0.44                     | 0.28                                          | 0.69        |
| <b>Marital status</b>                    |                          |                                               |             |
| Married (ref) <sup>3</sup>               | 1                        | -                                             | -           |
| Widowed                                  | 2.79                     | 1.35                                          | 5.77        |
| Divorced                                 | 2.34                     | 1.45                                          | 3.78        |
| Separated                                | 3.89                     | 1.49                                          | 10.16       |
| Never married                            | 1.62                     | 0.96                                          | 2.74        |
| <b>Race/Ethnicity</b>                    |                          |                                               |             |
| White (non-Hispanics) (ref) <sup>3</sup> | 1                        | -                                             | -           |
| Black (non-Hispanics)                    | 1.01                     | 0.46                                          | 2.23        |
| Other (non-Hispanics)                    | 0.74                     | 0.25                                          | 2.18        |
| Hispanics                                | 2.20                     | 1.15                                          | 4.21        |

<sup>1</sup>: Odds ratio. <sup>2</sup>: Confidence interval. <sup>3</sup>: Reference group. <sup>4</sup>: Smoke-Free Home. \*: the variable of interest in the sensitivity analysis.

- Smoking relapse is the only outcome.
- Total number of observations considered in the model was 3,182.
- The odds ratios in this table are all weighted and adjusted to all included variables
- All the values in the table are rounded to two decimal places, except for the p-values.

**Supplementary table-2:** Results of a multivariate logistic regression model for exploring predictors of smoking relapse among the US adult smokers using 3-months as a cut-off point for stratifying the smoking cessation period.

| Independent Variables                    | Adjusted OR <sup>1</sup> | Lower and upper limits of 95% CI <sup>2</sup> |             |
|------------------------------------------|--------------------------|-----------------------------------------------|-------------|
|                                          |                          | Lower                                         | Upper       |
| <b>Age group (years)</b>                 |                          |                                               |             |
| 65+ (ref) <sup>3</sup>                   | 1.00                     | -                                             | -           |
| 40-64                                    | 4.53                     | 2.33                                          | 8.81        |
| 25-39                                    | 8.45                     | 3.91                                          | 18.29       |
| 18-24                                    | 19.58                    | 5.61                                          | 68.31       |
| <b>Sex/Gender</b>                        |                          |                                               |             |
| Female (ref) <sup>3</sup>                | 1.00                     | -                                             | -           |
| Male                                     | 0.94                     | 0.63                                          | 1.40        |
| <b>Smoking cessation Period*</b>         |                          |                                               |             |
| < 3 Months (ref) <sup>3</sup>            | <b>1.00</b>              | -                                             | -           |
| ≥ 3 Months                               | <b>0.09</b>              | <b>0.04</b>                                   | <b>0.17</b> |
| <b>Living in SFH<sup>4</sup></b>         |                          |                                               |             |
| Non-SFH <sup>4</sup> (ref) <sup>3</sup>  | 1.00                     | -                                             | -           |
| SFH <sup>4</sup>                         | 0.41                     | 0.26                                          | 0.65        |
| <b>Marital status</b>                    |                          |                                               |             |
| Married (ref) <sup>3</sup>               | 1.00                     | -                                             | -           |
| Widowed                                  | 2.77                     | 1.32                                          | 5.79        |
| Divorced                                 | 2.20                     | 1.33                                          | 3.64        |
| Separated                                | 3.92                     | 1.53                                          | 10.02       |
| Never married                            | 1.51                     | 0.85                                          | 2.67        |
| <b>Race/Ethnicity</b>                    |                          |                                               |             |
| White (non-Hispanics) (ref) <sup>3</sup> | 1.00                     | -                                             | -           |
| Black (non-Hispanics)                    | 0.87                     | 0.37                                          | 2.07        |
| Other (non-Hispanics)                    | 0.83                     | 0.29                                          | 2.39        |
| Hispanics                                | 2.06                     | 1.06                                          | 4.01        |

<sup>1</sup>: Odds ratio. <sup>2</sup>: Confidence interval. <sup>3</sup>: Reference group. <sup>4</sup>: Smoke-Free Home. \*: the variable of interest in the sensitivity analysis.

- Smoking relapse is the only outcome.
- Total number of observations considered in the model was 3,182.
- The odds ratios in this table are all weighted and adjusted to all included variables
- All the values in the table are rounded to two decimal places, except for the p-values.

**Supplementary table-3:** Results of a multivariate logistic regression model for exploring predictors of smoking relapse among the US adult smokers using 1, 3 and 6-months as cut-off points for stratifying the smoking cessation period.

| Independent Variables                    | Adjusted OR <sup>1</sup> | Lower and upper limits of 95% CI <sup>2</sup> |             |
|------------------------------------------|--------------------------|-----------------------------------------------|-------------|
|                                          |                          | Lower                                         | Upper       |
| <b>Age group (years)</b>                 |                          |                                               |             |
| 65+ (ref) <sup>3</sup>                   | 1.00                     | -                                             | -           |
| 40-64                                    | 4.40                     | 2.25                                          | 8.61        |
| 25-39                                    | 8.20                     | 3.76                                          | 17.89       |
| 18-24                                    | 16.96                    | 4.64                                          | 62.01       |
| <b>Sex/Gender</b>                        |                          |                                               |             |
| Female (ref) <sup>3</sup>                | 1.00                     | -                                             | -           |
| Male                                     | 0.94                     | 0.62                                          | 1.41        |
| <b>Smoking cessation Period*</b>         |                          |                                               |             |
| < 1 Month (ref) <sup>3</sup>             | <b>1.00</b>              | -                                             | -           |
| <b>1 - 3 Months</b>                      | <b>0.61</b>              | <b>0.18</b>                                   | <b>2.03</b> |
| <b>3 - 6 Months</b>                      | <b>0.21</b>              | <b>0.06</b>                                   | <b>0.74</b> |
| <b>≥ 6 Months</b>                        | <b>0.06</b>              | <b>0.03</b>                                   | <b>0.14</b> |
| <b>Living in SFH<sup>4</sup></b>         |                          |                                               |             |
| Non-SFH <sup>4</sup> (ref) <sup>3</sup>  | 1.00                     | -                                             | -           |
| SFH <sup>4</sup>                         | 0.41                     | 0.26                                          | 0.65        |
| <b>Marital status</b>                    |                          |                                               |             |
| Married (ref) <sup>3</sup>               | 1.00                     | -                                             | -           |
| Widowed                                  | 2.80                     | 1.33                                          | 5.91        |
| Divorced                                 | 2.29                     | 1.38                                          | 3.79        |
| Separated                                | 3.94                     | 1.52                                          | 10.21       |
| Never married                            | 1.47                     | 0.81                                          | 2.65        |
| <b>Race/Ethnicity</b>                    |                          |                                               |             |
| White (non-Hispanics) (ref) <sup>3</sup> | 1.00                     | -                                             | -           |
| Black (non-Hispanics)                    | 0.88                     | 0.38                                          | 2.06        |
| Other (non-Hispanics)                    | 0.84                     | 0.30                                          | 2.37        |
| Hispanics                                | 2.02                     | 1.02                                          | 3.99        |

<sup>1</sup>: Odds ratio. <sup>2</sup>: Confidence interval. <sup>3</sup>: Reference group. <sup>4</sup>: Smoke-Free Home. \*: the variable of interest in the sensitivity analysis.

- Smoking relapse is the only outcome.
- Total number of observations considered in the model was 3,182.
- The odds ratios in this table are all weighted and adjusted to all included variables
- All the values in the table are rounded to two decimal places, except for the p-values.

**The RECORD statement – checklist of items, extended from the STROBE statement, that should be reported in observational studies using routinely collected health data.**

|                           | Item No. | STROBE items                                                                                                                                                                               | Location in manuscript where items are reported | RECORD items                                                                                                                                                                                                                                                                                                                                                                                                                                | Location in manuscript where items are reported |
|---------------------------|----------|--------------------------------------------------------------------------------------------------------------------------------------------------------------------------------------------|-------------------------------------------------|---------------------------------------------------------------------------------------------------------------------------------------------------------------------------------------------------------------------------------------------------------------------------------------------------------------------------------------------------------------------------------------------------------------------------------------------|-------------------------------------------------|
| <b>Title and abstract</b> |          |                                                                                                                                                                                            |                                                 |                                                                                                                                                                                                                                                                                                                                                                                                                                             |                                                 |
|                           | 1        | (a) Indicate the study's design with a commonly used term in the title or the abstract (b) Provide in the abstract an informative and balanced summary of what was done and what was found | 0-1                                             | RECORD 1.1: The type of data used should be specified in the title or abstract. When possible, the name of the databases used should be included.<br><br>RECORD 1.2: If applicable, the geographic region and timeframe within which the study took place should be reported in the title or abstract.<br><br>RECORD 1.3: If linkage between databases was conducted for the study, this should be clearly stated in the title or abstract. | 1                                               |
| <b>Introduction</b>       |          |                                                                                                                                                                                            |                                                 |                                                                                                                                                                                                                                                                                                                                                                                                                                             |                                                 |
| Background rationale      | 2        | Explain the scientific background and rationale for the investigation being reported                                                                                                       | 5                                               |                                                                                                                                                                                                                                                                                                                                                                                                                                             |                                                 |
| Objectives                | 3        | State specific objectives, including any prespecified hypotheses                                                                                                                           | 6                                               |                                                                                                                                                                                                                                                                                                                                                                                                                                             |                                                 |
| <b>Methods</b>            |          |                                                                                                                                                                                            |                                                 |                                                                                                                                                                                                                                                                                                                                                                                                                                             |                                                 |
| Study Design              | 4        | Present key elements of study design early in the paper                                                                                                                                    | 7                                               |                                                                                                                                                                                                                                                                                                                                                                                                                                             |                                                 |
| Setting                   | 5        | Describe the setting, locations, and relevant dates, including periods of recruitment, exposure, follow-up, and data collection                                                            | 7                                               |                                                                                                                                                                                                                                                                                                                                                                                                                                             |                                                 |



|                                                                                                                                                                                                            |          |                                                                                                                                                                                                                                                                                                                                                                                                                                                                                                                                                                                                                                                                                                                        |            |                                                                                                                                                                                                                                                                                                                                                                                                                                                                                                                                                                                                                                                                                                      |          |
|------------------------------------------------------------------------------------------------------------------------------------------------------------------------------------------------------------|----------|------------------------------------------------------------------------------------------------------------------------------------------------------------------------------------------------------------------------------------------------------------------------------------------------------------------------------------------------------------------------------------------------------------------------------------------------------------------------------------------------------------------------------------------------------------------------------------------------------------------------------------------------------------------------------------------------------------------------|------------|------------------------------------------------------------------------------------------------------------------------------------------------------------------------------------------------------------------------------------------------------------------------------------------------------------------------------------------------------------------------------------------------------------------------------------------------------------------------------------------------------------------------------------------------------------------------------------------------------------------------------------------------------------------------------------------------------|----------|
| <p>1<br/>2<br/>3<br/>4<br/>5<br/>6<br/>7<br/>8<br/>9<br/>10<br/>11<br/>12<br/>13<br/>14<br/>15<br/>16<br/>17<br/>18<br/>19<br/>20<br/>21<br/>22<br/>23<br/>24<br/>25<br/>26<br/>27</p> <p>Participants</p> | <p>6</p> | <p>(a) <i>Cohort study</i> - Give the eligibility criteria, and the sources and methods of selection of participants. Describe methods of follow-up<br/> <i>Case-control study</i> - Give the eligibility criteria, and the sources and methods of case ascertainment and control selection. Give the rationale for the choice of cases and controls<br/> <i>Cross-sectional study</i> - Give the eligibility criteria, and the sources and methods of selection of participants</p> <p>(b) <i>Cohort study</i> - For matched studies, give matching criteria and number of exposed and unexposed<br/> <i>Case-control study</i> - For matched studies, give matching criteria and the number of controls per case</p> | <p>7</p>   | <p>RECORD 6.1: The methods of study population selection (such as codes or algorithms used to identify subjects) should be listed in detail. If this is not possible, an explanation should be provided.</p> <p>RECORD 6.2: Any validation studies of the codes or algorithms used to select the population should be referenced. If validation was conducted for this study and not published elsewhere, detailed methods and results should be provided.</p> <p>RECORD 6.3: If the study involved linkage of databases, consider use of a flow diagram or other graphical display to demonstrate the data linkage process, including the number of individuals with linked data at each stage.</p> | <p>7</p> |
| <p>28<br/>29<br/>30<br/>31<br/>32<br/>33<br/>34</p> <p>Variables</p>                                                                                                                                       | <p>7</p> | <p>Clearly define all outcomes, exposures, predictors, potential confounders, and effect modifiers. Give diagnostic criteria, if applicable.</p>                                                                                                                                                                                                                                                                                                                                                                                                                                                                                                                                                                       | <p>8</p>   | <p>RECORD 7.1: A complete list of codes and algorithms used to classify exposures, outcomes, confounders, and effect modifiers should be provided. If these cannot be reported, an explanation should be provided.</p>                                                                                                                                                                                                                                                                                                                                                                                                                                                                               | <p>8</p> |
| <p>35<br/>36<br/>37<br/>38<br/>39<br/>40<br/>41<br/>42</p> <p>Data sources/<br/>measurement</p>                                                                                                            | <p>8</p> | <p>For each variable of interest, give sources of data and details of methods of assessment (measurement). Describe comparability of assessment methods if there is more than one group</p>                                                                                                                                                                                                                                                                                                                                                                                                                                                                                                                            | <p>8-9</p> |                                                                                                                                                                                                                                                                                                                                                                                                                                                                                                                                                                                                                                                                                                      |          |

|                                                                                                                                                    |                                  |    |                                                                                                                                                                                                                                                                                                                                                                                                                                                                                                                                                                      |      |                                                                                                                                                            |
|----------------------------------------------------------------------------------------------------------------------------------------------------|----------------------------------|----|----------------------------------------------------------------------------------------------------------------------------------------------------------------------------------------------------------------------------------------------------------------------------------------------------------------------------------------------------------------------------------------------------------------------------------------------------------------------------------------------------------------------------------------------------------------------|------|------------------------------------------------------------------------------------------------------------------------------------------------------------|
| 1<br>2<br>3<br>4                                                                                                                                   | Bias                             | 9  | Describe any efforts to address potential sources of bias                                                                                                                                                                                                                                                                                                                                                                                                                                                                                                            | 7-9  |                                                                                                                                                            |
| 5<br>6<br>7<br>8<br>9                                                                                                                              | Study size                       | 10 | Explain how the study size was arrived at                                                                                                                                                                                                                                                                                                                                                                                                                                                                                                                            | 7-8  |                                                                                                                                                            |
| 10<br>11<br>12<br>13<br>14<br>15<br>16<br>17<br>18<br>19<br>20<br>21<br>22<br>23<br>24<br>25<br>26<br>27<br>28<br>29<br>30<br>31<br>32<br>33<br>34 | Quantitative variables           | 11 | Explain how quantitative variables were handled in the analyses. If applicable, describe which groupings were chosen, and why                                                                                                                                                                                                                                                                                                                                                                                                                                        | 9-10 |                                                                                                                                                            |
| 35<br>36<br>37<br>38<br>39<br>40<br>41<br>42<br>43<br>44<br>45<br>46<br>47                                                                         | Statistical methods              | 12 | (a) Describe all statistical methods, including those used to control for confounding<br>(b) Describe any methods used to examine subgroups and interactions<br>(c) Explain how missing data were addressed<br>(d) <i>Cohort study</i> - If applicable, explain how loss to follow-up was addressed<br><i>Case-control study</i> - If applicable, explain how matching of cases and controls was addressed<br><i>Cross-sectional study</i> - If applicable, describe analytical methods taking account of sampling strategy<br>(e) Describe any sensitivity analyses | 9    |                                                                                                                                                            |
|                                                                                                                                                    | Data access and cleaning methods |    | ..                                                                                                                                                                                                                                                                                                                                                                                                                                                                                                                                                                   |      | RECORD 12.1: Authors should describe the extent to which the investigators had access to the database population used to create the study population.<br>7 |

|                  |    |                                                                                                                                                                                                                                                                                                                                                 |               |                                                                                                                                                                                                                                                                                                                    |          |
|------------------|----|-------------------------------------------------------------------------------------------------------------------------------------------------------------------------------------------------------------------------------------------------------------------------------------------------------------------------------------------------|---------------|--------------------------------------------------------------------------------------------------------------------------------------------------------------------------------------------------------------------------------------------------------------------------------------------------------------------|----------|
|                  |    |                                                                                                                                                                                                                                                                                                                                                 |               | RECORD 12.2: Authors should provide information on the data cleaning methods used in the study.                                                                                                                                                                                                                    |          |
| Linkage          |    | ..                                                                                                                                                                                                                                                                                                                                              |               | RECORD 12.3: State whether the study included person-level, institutional-level, or other data linkage across two or more databases. The methods of linkage and methods of linkage quality evaluation should be provided.                                                                                          | 7-8      |
| <b>Results</b>   |    |                                                                                                                                                                                                                                                                                                                                                 |               |                                                                                                                                                                                                                                                                                                                    |          |
| Participants     | 13 | (a) Report the numbers of individuals at each stage of the study ( <i>e.g.</i> , numbers potentially eligible, examined for eligibility, confirmed eligible, included in the study, completing follow-up, and analysed)<br>(b) Give reasons for non-participation at each stage.<br>(c) Consider use of a flow diagram                          | 11 + Figure 1 | RECORD 13.1: Describe in detail the selection of the persons included in the study ( <i>i.e.</i> , study population selection) including filtering based on data quality, data availability and linkage. The selection of included persons can be described in the text and/or by means of the study flow diagram. | Figure 1 |
| Descriptive data | 14 | (a) Give characteristics of study participants ( <i>e.g.</i> , demographic, clinical, social) and information on exposures and potential confounders<br>(b) Indicate the number of participants with missing data for each variable of interest<br>(c) <i>Cohort study</i> - summarise follow-up time ( <i>e.g.</i> , average and total amount) | 11 + Table 1  |                                                                                                                                                                                                                                                                                                                    |          |
| Outcome data     | 15 | <i>Cohort study</i> - Report numbers of outcome events or summary measures over time<br><i>Case-control study</i> - Report numbers in each exposure                                                                                                                                                                                             | 11-12         |                                                                                                                                                                                                                                                                                                                    |          |

|                   |    |                                                                                                                                                                                                                                                                                                                                                                                                                 |                              |                                                                                                                                                                                                                                                                                                          |       |
|-------------------|----|-----------------------------------------------------------------------------------------------------------------------------------------------------------------------------------------------------------------------------------------------------------------------------------------------------------------------------------------------------------------------------------------------------------------|------------------------------|----------------------------------------------------------------------------------------------------------------------------------------------------------------------------------------------------------------------------------------------------------------------------------------------------------|-------|
|                   |    | category, or summary measures of exposure<br><i>Cross-sectional study</i> - Report numbers of outcome events or summary measures                                                                                                                                                                                                                                                                                |                              |                                                                                                                                                                                                                                                                                                          |       |
| Main results      | 16 | (a) Give unadjusted estimates and, if applicable, confounder-adjusted estimates and their precision (e.g., 95% confidence interval). Make clear which confounders were adjusted for and why they were included<br>(b) Report category boundaries when continuous variables were categorized<br>(c) If relevant, consider translating estimates of relative risk into absolute risk for a meaningful time period | 11-12 + figure 2 and table 2 |                                                                                                                                                                                                                                                                                                          |       |
| Other analyses    | 17 | Report other analyses done— e.g., analyses of subgroups and interactions, and sensitivity analyses                                                                                                                                                                                                                                                                                                              | 12                           |                                                                                                                                                                                                                                                                                                          |       |
| <b>Discussion</b> |    |                                                                                                                                                                                                                                                                                                                                                                                                                 |                              |                                                                                                                                                                                                                                                                                                          |       |
| Key results       | 18 | Summarise key results with reference to study objectives                                                                                                                                                                                                                                                                                                                                                        | 13                           |                                                                                                                                                                                                                                                                                                          |       |
| Limitations       | 19 | Discuss limitations of the study, taking into account sources of potential bias or imprecision. Discuss both direction and magnitude of any potential bias                                                                                                                                                                                                                                                      | 15                           | RECORD 19.1: Discuss the implications of using data that were not created or collected to answer the specific research question(s). Include discussion of misclassification bias, unmeasured confounding, missing data, and changing eligibility over time, as they pertain to the study being reported. | 15-16 |
| Interpretation    | 20 | Give a cautious overall interpretation of results considering objectives,                                                                                                                                                                                                                                                                                                                                       | 13-15                        |                                                                                                                                                                                                                                                                                                          |       |

|                                                           |    |                                                                                                                                                               |    |                                                                                                                                                          |   |
|-----------------------------------------------------------|----|---------------------------------------------------------------------------------------------------------------------------------------------------------------|----|----------------------------------------------------------------------------------------------------------------------------------------------------------|---|
|                                                           |    | limitations, multiplicity of analyses, results from similar studies, and other relevant evidence                                                              |    |                                                                                                                                                          |   |
| Generalisability                                          | 21 | Discuss the generalisability (external validity) of the study results                                                                                         | 15 |                                                                                                                                                          |   |
| <b>Other Information</b>                                  |    |                                                                                                                                                               |    |                                                                                                                                                          |   |
| Funding                                                   | 22 | Give the source of funding and the role of the funders for the present study and, if applicable, for the original study on which the present article is based | 17 |                                                                                                                                                          |   |
| Accessibility of protocol, raw data, and programming code |    | ..                                                                                                                                                            |    | RECORD 22.1: Authors should provide information on how to access any supplemental information such as the study protocol, raw data, or programming code. | 7 |

\*Reference: Benchimol EI, Smeeth L, Guttman A, Harron K, Moher D, Petersen I, Sørensen HT, von Elm E, Langan SM, the RECORD Working Committee. The REporting of studies Conducted using Observational Routinely-collected health Data (RECORD) Statement. *PLoS Medicine* 2015; in press.

\*Checklist is protected under Creative Commons Attribution ([CC BY](https://creativecommons.org/licenses/by/4.0/)) license.
