# Supplementary material for: Prevalence and determinants of cigarette smoking relapse among US adult smokers: a longitudinal study
Source: PubMed Central journal article supplement — BMJ Open. 2019 Nov 25;9(11):e031676. doi: 10.1136/bmjopen-2019-031676 (PMC6886963; doi:10.1136/bmjopen-2019-031676), 2019-11-25
Supplement: bmjopen-2019-031676supp001.pdf [file bmjopen-2019-031676supp001.pdf]

**Supplementary table-1:** Results of a multivariate logistic regression model for exploring predictors of smoking relapse among the US adult smokers using 1-month as a cut-off point for stratifying the smoking cessation period.

| Independent Variables                    | Adjusted OR <sup>1</sup> | Lower and upper limits of 95% CI <sup>2</sup> |             |
|------------------------------------------|--------------------------|-----------------------------------------------|-------------|
|                                          |                          | Lower                                         | Upper       |
| <b>Age group (years)</b>                 |                          |                                               |             |
| 65+ (ref) <sup>3</sup>                   | 1                        | -                                             | -           |
| 40-64                                    | 4.55                     | 2.39                                          | 8.68        |
| 25-39                                    | 9.32                     | 4.47                                          | 19.43       |
| 18-24                                    | 22.82                    | 7.45                                          | 69.90       |
| <b>Sex/Gender</b>                        |                          |                                               |             |
| Female (ref) <sup>3</sup>                | 1                        | -                                             | -           |
| Male                                     | 0.89                     | 0.60                                          | 1.31        |
| <b>Smoking cessation Period*</b>         |                          |                                               |             |
| < 1 Month (ref) <sup>3</sup>             | 1                        | -                                             | -           |
| ≥ 1 Month                                | <b>0.08</b>              | <b>0.03</b>                                   | <b>0.17</b> |
| <b>Living in SFH<sup>4</sup></b>         |                          |                                               |             |
| Non-SFH <sup>4</sup>                     | 1                        | -                                             | -           |
| SFH <sup>4</sup>                         | 0.44                     | 0.28                                          | 0.69        |
| <b>Marital status</b>                    |                          |                                               |             |
| Married (ref) <sup>3</sup>               | 1                        | -                                             | -           |
| Widowed                                  | 2.79                     | 1.35                                          | 5.77        |
| Divorced                                 | 2.34                     | 1.45                                          | 3.78        |
| Separated                                | 3.89                     | 1.49                                          | 10.16       |
| Never married                            | 1.62                     | 0.96                                          | 2.74        |
| <b>Race/Ethnicity</b>                    |                          |                                               |             |
| White (non-Hispanics) (ref) <sup>3</sup> | 1                        | -                                             | -           |
| Black (non-Hispanics)                    | 1.01                     | 0.46                                          | 2.23        |
| Other (non-Hispanics)                    | 0.74                     | 0.25                                          | 2.18        |
| Hispanics                                | 2.20                     | 1.15                                          | 4.21        |

<sup>1</sup>: Odds ratio. <sup>2</sup>: Confidence interval. <sup>3</sup>: Reference group. <sup>4</sup>: Smoke-Free Home. \*: the variable of interest in the sensitivity analysis.

- Smoking relapse is the only outcome.
- Total number of observations considered in the model was 3,182.
- The odds ratios in this table are all weighted and adjusted to all included variables
- All the values in the table are rounded to two decimal places, except for the p-values.

**Supplementary table-2:** Results of a multivariate logistic regression model for exploring predictors of smoking relapse among the US adult smokers using 3-months as a cut-off point for stratifying the smoking cessation period.

| Independent Variables                    | Adjusted OR <sup>1</sup> | Lower and upper limits of 95% CI <sup>2</sup> |             |
|------------------------------------------|--------------------------|-----------------------------------------------|-------------|
|                                          |                          | Lower                                         | Upper       |
| <b>Age group (years)</b>                 |                          |                                               |             |
| 65+ (ref) <sup>3</sup>                   | 1.00                     | -                                             | -           |
| 40-64                                    | 4.53                     | 2.33                                          | 8.81        |
| 25-39                                    | 8.45                     | 3.91                                          | 18.29       |
| 18-24                                    | 19.58                    | 5.61                                          | 68.31       |
| <b>Sex/Gender</b>                        |                          |                                               |             |
| Female (ref) <sup>3</sup>                | 1.00                     | -                                             | -           |
| Male                                     | 0.94                     | 0.63                                          | 1.40        |
| <b>Smoking cessation Period*</b>         |                          |                                               |             |
| < 3 Months (ref) <sup>3</sup>            | <b>1.00</b>              | -                                             | -           |
| ≥ 3 Months                               | <b>0.09</b>              | <b>0.04</b>                                   | <b>0.17</b> |
| <b>Living in SFH<sup>4</sup></b>         |                          |                                               |             |
| Non-SFH <sup>4</sup> (ref) <sup>3</sup>  | 1.00                     | -                                             | -           |
| SFH <sup>4</sup>                         | 0.41                     | 0.26                                          | 0.65        |
| <b>Marital status</b>                    |                          |                                               |             |
| Married (ref) <sup>3</sup>               | 1.00                     | -                                             | -           |
| Widowed                                  | 2.77                     | 1.32                                          | 5.79        |
| Divorced                                 | 2.20                     | 1.33                                          | 3.64        |
| Separated                                | 3.92                     | 1.53                                          | 10.02       |
| Never married                            | 1.51                     | 0.85                                          | 2.67        |
| <b>Race/Ethnicity</b>                    |                          |                                               |             |
| White (non-Hispanics) (ref) <sup>3</sup> | 1.00                     | -                                             | -           |
| Black (non-Hispanics)                    | 0.87                     | 0.37                                          | 2.07        |
| Other (non-Hispanics)                    | 0.83                     | 0.29                                          | 2.39        |
| Hispanics                                | 2.06                     | 1.06                                          | 4.01        |

<sup>1</sup>: Odds ratio. <sup>2</sup>: Confidence interval. <sup>3</sup>: Reference group. <sup>4</sup>: Smoke-Free Home. \*: the variable of interest in the sensitivity analysis.

- Smoking relapse is the only outcome.
- Total number of observations considered in the model was 3,182.
- The odds ratios in this table are all weighted and adjusted to all included variables
- All the values in the table are rounded to two decimal places, except for the p-values.

**Supplementary table-3:** Results of a multivariate logistic regression model for exploring predictors of smoking relapse among the US adult smokers using 1, 3 and 6-months as cut-off points for stratifying the smoking cessation period.

| Independent Variables                    | Adjusted OR <sup>1</sup> | Lower and upper limits of 95% CI <sup>2</sup> |             |
|------------------------------------------|--------------------------|-----------------------------------------------|-------------|
|                                          |                          | Lower                                         | Upper       |
| <b>Age group (years)</b>                 |                          |                                               |             |
| 65+ (ref) <sup>3</sup>                   | 1.00                     | -                                             | -           |
| 40-64                                    | 4.40                     | 2.25                                          | 8.61        |
| 25-39                                    | 8.20                     | 3.76                                          | 17.89       |
| 18-24                                    | 16.96                    | 4.64                                          | 62.01       |
| <b>Sex/Gender</b>                        |                          |                                               |             |
| Female (ref) <sup>3</sup>                | 1.00                     | -                                             | -           |
| Male                                     | 0.94                     | 0.62                                          | 1.41        |
| <b>Smoking cessation Period*</b>         |                          |                                               |             |
| < 1 Month (ref) <sup>3</sup>             | <b>1.00</b>              | -                                             | -           |
| <b>1 - 3 Months</b>                      | <b>0.61</b>              | <b>0.18</b>                                   | <b>2.03</b> |
| <b>3 - 6 Months</b>                      | <b>0.21</b>              | <b>0.06</b>                                   | <b>0.74</b> |
| <b>≥ 6 Months</b>                        | <b>0.06</b>              | <b>0.03</b>                                   | <b>0.14</b> |
| <b>Living in SFH<sup>4</sup></b>         |                          |                                               |             |
| Non-SFH <sup>4</sup> (ref) <sup>3</sup>  | 1.00                     | -                                             | -           |
| SFH <sup>4</sup>                         | 0.41                     | 0.26                                          | 0.65        |
| <b>Marital status</b>                    |                          |                                               |             |
| Married (ref) <sup>3</sup>               | 1.00                     | -                                             | -           |
| Widowed                                  | 2.80                     | 1.33                                          | 5.91        |
| Divorced                                 | 2.29                     | 1.38                                          | 3.79        |
| Separated                                | 3.94                     | 1.52                                          | 10.21       |
| Never married                            | 1.47                     | 0.81                                          | 2.65        |
| <b>Race/Ethnicity</b>                    |                          |                                               |             |
| White (non-Hispanics) (ref) <sup>3</sup> | 1.00                     | -                                             | -           |
| Black (non-Hispanics)                    | 0.88                     | 0.38                                          | 2.06        |
| Other (non-Hispanics)                    | 0.84                     | 0.30                                          | 2.37        |
| Hispanics                                | 2.02                     | 1.02                                          | 3.99        |

<sup>1</sup>: Odds ratio. <sup>2</sup>: Confidence interval. <sup>3</sup>: Reference group. <sup>4</sup>: Smoke-Free Home. \*: the variable of interest in the sensitivity analysis.

- Smoking relapse is the only outcome.
- Total number of observations considered in the model was 3,182.
- The odds ratios in this table are all weighted and adjusted to all included variables
- All the values in the table are rounded to two decimal places, except for the p-values.
